# Supplementary material for: Impact of lowering fine particulate matter from major emission sources on mortality in Canada: A nationwide causal analysis
Source: PubMed Central journal article supplement — Proc Natl Acad Sci U S A. 2022 Nov 29;119(49):e2209490119. doi: 10.1073/pnas.2209490119 (PMC9894124; doi:10.1073/pnas.2209490119), 2022-11-29
Supplement: pnas.2209490119.sapp.pdf [file pnas.2209490119.sapp.pdf]

## Supporting Information

### Impact of lowering fine particulate matter from major emission sources on mortality in Canada: a nationwide causal analysis

Hong Chen,<sup>1,2,3,4</sup> Matthew Quick,<sup>5</sup> Jay S. Kaufman,<sup>6,7</sup> Chen Chen,<sup>8</sup> Jeffrey C. Kwong,<sup>2,3,4,9</sup> Aaron van Donkelaar,<sup>10</sup> Jun Meng,<sup>10,11</sup> Randall V. Martin,<sup>10</sup> JinHee Kim,<sup>2,4</sup> Eric Lavigne,<sup>12,13</sup> Li Bai,<sup>3</sup> Yi Li,<sup>6</sup> Michael Tjepkema,<sup>5</sup> Tarik Benmarhnia,<sup>8</sup> Richard T. Burnett<sup>1</sup>

<sup>1</sup> Environmental Health Science and Research Bureau, Health Canada, Ottawa, ON, K1A 0K9 Canada

<sup>2</sup> Public Health Ontario, Toronto, ON, M5G 1V2, Canada

<sup>3</sup> ICES, Toronto, ON, M4N 3M5, Canada

<sup>4</sup> Dalla Lana School of Public Health, University of Toronto, Toronto, ON, M5T 3M7, Canada

<sup>5</sup> Health Analysis Division, Statistics Canada, Ottawa, ON, K1A 0T6, Canada

<sup>6</sup> Department of Epidemiology and Biostatistics, McGill University, Montreal, QC, H3A 1G1, Canada

<sup>7</sup> Institute for Health and Social Policy, McGill University, Montreal, QC, H3A 1G1, Canada

<sup>8</sup> Scripps Institution of Oceanography, University of California, San Diego, La Jolla, CA, 92037, USA

<sup>9</sup> Department of Family and Community Medicine, University of Toronto, Toronto, Ontario, M5T 3M7, Canada

<sup>10</sup> Department of Energy, Environment & Chemical Engineering, Washington University, St Louis, Missouri, 63112, USA

<sup>11</sup> Air Quality Research Division, Environment and Climate Change Canada, Downview, ON, M3H 5T4, Canada

<sup>12</sup> School of Epidemiology and Public Health, University of Ottawa, Ottawa, ON, K1G 5Z3 Canada

<sup>13</sup> Air Health Science Division, Health Canada, Ottawa, ON, K1A 0K9 Canada

#### Correspondence:

Hong Chen, PhD  
Environmental Health Science and Research Bureau  
Health Canada  
251 Sir Frederick Banting Driveway  
Ottawa, Ontario K1A 0K9  
Tel: 343-542-3483  
Email: [hong.chen@hc-sc.gc.ca](mailto:hong.chen@hc-sc.gc.ca)

## Table of Contents

|                                                                               |    |
|-------------------------------------------------------------------------------|----|
| Application of the g-formula.....                                             | 3  |
| Identifiability assumption.....                                               | 3  |
| Selected differences between the traditional Cox model and the g-formula..... | 5  |
| Syntax of R code for implementation of the g-formula approach.....            | 5  |
| Figure Legends.....                                                           | 26 |
| Reference.....                                                                | 35 |

### *Application of the g-formula*

We outlined the algorithm for our application of the g-formula approach as follows:

Step 1, for each year between 2007 and 2016, model the conditional densities of time-varying PM<sub>2.5</sub> and all confounding variables using the whole sample, given covariate histories, in the following temporal ordering: (1) airshed; (2) community size; (3) urban form; (4) annual family income (in decile); (5) census-tract level ethnic concentration; (6) census-tract level deprivation index; (7) census-tract level instability measure; (8) census-tract level dependency measure; and (9) annual PM<sub>2.5</sub> exposure. Each variable was regressed against everything that came before it. Time-fixed covariates were included in all models.

Step 2, model the conditional probability (discrete hazard) of nonaccidental death at each year, given PM<sub>2.5</sub> and covariate histories, time-fixed covariates, and surviving and remaining uncensored to the previous time, using the whole sample.

Step 3, simulate a cohort followed between 2007 and 2016 under the intervention of interest as follows: (1) select a random sample (n=10,000) from the study population; (2) for each individual in the resample cohort and for 2007, set PM<sub>2.5</sub> and all other covariates to the observed values; (3) for each individual and for each year  $t$  from 2008 to 2016, predict time  $t$  covariates by applying coefficients estimated by covariate models in step 1 to data from times  $t-3$ ,  $t-2$ ,  $t-1$ , and  $t$ ; (4) change time  $t$  covariate data as specified by the intervention of interest; (5) predict the probability of nonaccidental death between time  $t$  and  $t+1$  by applying the coefficients estimated by outcome model in step 2 to data from times  $t-3$ ,  $t-2$ ,  $t-1$ , and  $t$ . Repeat (2) to (5) for each individual and for each year in the resampled cohort.

Step 4, estimate marginal estimate of the risk of nonaccidental death under the intervention as the average of the subject-specific risks in the resampled cohort.

Step 5, repeat steps 3 and 4 for each intervention of interest.

Step 6, repeat steps 3-5 on 200 nonparametric bootstrap resamples to construct the 95% confidence intervals (CI) for the risk difference and risk ratio of nonaccidental death with measures of comparison between two interventions.

### *Identifiability assumptions*

Like any modern causal inference methods, the application of the g-formula relies on three identifiability assumptions (exchangeable, positivity, and consistency). Exchangeability assumes the absence of unmeasured confounding. This identifiability assumption is external to the data,<sup>1-3</sup> requiring us to make the assumption based on subject-matter knowledge about the PM<sub>2.5</sub>-mortality relationship. To do this, we created a directed acyclic diagram (DAG) to conceptualize our subject-matter knowledge about the qualitative causal structure linking PM<sub>2.5</sub> exposure, nonaccidental death, and other measured and unmeasured covariates, according to the existing

literature. Using the established graphic rules (*i.e.*, d-separation rules),<sup>4</sup> we carefully evaluated potential confounding variables to be considered in the analysis and the possible impact of unmeasured confounding (if any). As shown in the DAG (Appendix Figure S1), it is highly unlikely that unmeasured confounding would appreciably explain our observed association of changes in PM<sub>2.5</sub> exposure with changes in nonaccidental mortality. In addition, as described in our manuscript, we conducted a sensitivity analysis using Cox model to compare this study with the existing literature. We found that our estimated PM<sub>2.5</sub>-mortality association was consistent with those reported elsewhere.<sup>16-22</sup> For example, in a recent large multiple-country cohort study, Strak *et al.* (2022) reported that each  $\mu\text{g}/\text{m}^3$  increase in PM<sub>2.5</sub> exposure was associated with a hazard ratio of 1.02 (95% CI: 1.02 to 1.03) with nonaccidental mortality.<sup>16</sup> Similarly, in a large cohort study comprising 61 million adults in the continental U.S., Di *et al.* estimated that every  $\mu\text{g}/\text{m}^3$  increase in PM<sub>2.5</sub> exposure was associated with a hazard ratio of 1.01 (95% CI: 1.01 to 1.01) with nonaccidental mortality.<sup>17</sup> To enhance communication about our causal theories with readers and to be explicit about our assumption about exchangeability, we presented this DAG in our manuscript.

The second assumption (positivity) posits that the probability of being exposed conditional on adjustment variables is greater than zero.<sup>3</sup> This assumption was well supported by the fact that this study comprised a very large population-based cohort (2.7 million adults) and that all the intervention strategies examined would lead to only modest changes in individuals' PM<sub>2.5</sub> exposures proportional to their observed exposure levels (ranging from ~1% to 14%, depending on year and source). The third assumption (consistency) further posits that the PM<sub>2.5</sub> exposure levels under comparison correspond to well-defined interventions.<sup>2,3</sup> This is indeed an important strength of this study. Previous studies often predicted sizable near-term reductions in the mortality effect of PM<sub>2.5</sub> based on unspecified interventions and under the assumption of instantaneously eliminating human-caused PM<sub>2.5</sub>. In comparison, for our study interventions, we evaluated sustained and dynamic treatment regimes that comprised a sequence of actions across multiple strategies (*e.g.*, 25% incremental), emission sources (*e.g.*, transportation), and time periods. Our refined specifications of interventions were more supported by the data because the declines in ambient PM<sub>2.5</sub> in many developed countries including Canada have been progressive over last several decades and were largely driven by air quality regulations (and technology developments). Although we may further delineate the intervention specifications, for example, to require the potential reductions in transportation PM<sub>2.5</sub> by means of improving a given engine technology (*e.g.*, crankcase ventilation systems or diesel oxidation catalysts), it is reasonable to assume that these additional specifications would produce approximately equivalent results. Taken together, by focusing on more clearly defined interventions that correspond to complex but more realistic air quality actions, this study improved upon the previous studies by sharpening counterfactual contrasts in PM<sub>2.5</sub> exposures and mortality. This allowed for more meaningful interpretation of PM<sub>2.5</sub> reductions and changes in mortality risk.

We acknowledge that regardless of how much data are available, we cannot completely rule out the uncertainty about the identifiability assumptions. However, conditional on these identifiability assumptions (which are deemed reasonable in this study), our results derived from the g-formula approach can have causal interpretations.

### ***Selected differences between the traditional Cox model and the g-formula***

Compared with the Cox model, a notable strength of the g-formula approach is that it is highly flexible and can be used to evaluate a range of potential interventions. These include complex dynamic interventions that can comprise a sequence of actions over time, which cannot be evaluated by the traditional Cox model. In addition, the g-formula generates marginal effect measures that are directly interpreted as the contrasts between the risk that would have been observed if everyone in the entire population had been subject to an intervention regime of interest and the risk that would have been observed if all individuals had been subject to a different intervention regime (*e.g.*, the natural course). Such effect estimates are more useful for informing population-level interventions. Furthermore, the g-formula allows to yield the effect measures on the additive scale (in addition to the multiplicative scale). All of these characteristics are particularly relevant to the inferential goal of this study. An additional strength of the g-formula is that when the assumption that the covariates are independent of pollution does not hold, the Cox modeling approach would yield biased estimates but the g-formula approach would yield unbiased estimates.<sup>24</sup> Although this advantage is likely inconsequential in the present study given the relatively low PM<sub>2.5</sub> levels in Canada, in other regions with relatively high PM<sub>2.5</sub> levels, this aspect of the g-formula may be more important. For more details, please refer to Appendix Table S4.

### ***Syntax of R code for implementation of the g-formula approach***

```
library(gfoRmula)
library(data.table)
library(survival)
library(Hmisc)
library(parallel)
library(dplyr)

##### Model code for Chen et al. #####
### Impact of lowering fine particulate matter from major emission sources on
### mortality in Canada: a nationwide causal analysis

##### Variables #####
### Baseline time-fixed variables
### X1-X4: cubic spline terms of age
### X5: sex
### X6: race/ethnicity
### X7: indigenous identity
### X8: landed immigrant status
### X9: years since in Canada
### X10: marital status
### X11: education
### X12: employment
```

```
### X13: occupation
### person_id: subject id
```

```
### Time-varying variables
### L1: airshed
### L2: community size
### L3: urban form
### L4: family income
### L5: ethnic concentration
### L6: material deprivation
### L7: residential instability
### L8: dependency
### A: annual PM2.5 (in log scale)
### Y: nonaccidental death
### time: follow up (in years)
```

```
##### Specify model for outcome #####
```

```
outcome_model <- reformulate(c(
  ### exposure
  "I( log((exp(lag1_A)+exp(lag2_A)+exp(lag3_A))/3) )",

  ### baseline covariates
  "X1", "X2", "X3", "X4", "X5",
  "X10", 'X12', 'X13', 'X11',
  "X6", "X7", "X8", "I(X9 * X8)",

  ### time-varying covariates
  ### time-varying covariates are modeled using bounded normal likelihoods
  ### they are rounded to closest integer and specified as factors in the outcome regression model
  "as.factor(lag1_L1)", "as.factor(lag2_L1)", "as.factor(lag3_L1)",
  "as.factor(lag1_L2)", "as.factor(lag2_L2)", "as.factor(lag3_L2)",
  "as.factor(lag1_L3)", "as.factor(lag2_L3)", "as.factor(lag3_L3)",
  "as.factor(lag1_L4)", "as.factor(lag2_L4)", "as.factor(lag3_L4)",
  "as.factor(lag1_L8)", "as.factor(lag2_L8)", "as.factor(lag3_L8)",
  "as.factor(lag1_L6)", "as.factor(lag2_L6)", "as.factor(lag3_L6)",
  "as.factor(lag1_L5)", "as.factor(lag2_L5)", "as.factor(lag3_L5)",
  "as.factor(lag1_L7)", "as.factor(lag2_L7)", "as.factor(lag3_L7)",

  ### time
  "time", "I(time*time)",

  ### time - exposure interaction
  paste0("I( log((exp(lag1_A)+exp(lag2_A)+exp(lag3_A))/3) )", " : ", "factor(time)")),
```

```
response = "Y")
```

```
##### Specify time-varying covariates #####
```

```
### variable names
```

```
covnames <- c("L1", "L2", "L3",  
             "L4", "L5",  
             "L6", "L7", "L8",  
             "A")
```

```
### model likelihoods
```

```
covtypes <- c("bounded normal", "bounded normal", "bounded normal",  
             "bounded normal", "bounded normal",  
             "bounded normal", "bounded normal", "bounded normal",  
             "normal")
```

```
### name labels
```

```
covlabels <- covnames  
names(covlabels) <- c("Airshed", "Community size", "Urban form",  
                    "Family Income", "Ethnic concentration",  
                    "Material deprivation", "Residential instability", "Dependency",  
                    "PM2.5")
```

```
### regression models
```

```
tv_cov_models <- list(covmodels = c(  
  

```

```
### model for airshed
```

```
L1 ~ X1 + X2 + X3 + X4 +  
     X10 + X12 + X11 + X13 +  
     X5 +  
     X6 + X7 + X8 + I(X9 * X8) +  
     lag1_L1 + lag2_L1 + lag3_L1 +  
     lag1_L2 + lag2_L2 + lag3_L2 +  
     lag1_L3 + lag2_L3 + lag3_L3 +  
     lag1_L4 + lag2_L4 + lag3_L4 +  
     lag1_L5 + lag2_L5 + lag3_L5 +  
     lag1_L6 + lag2_L6 + lag3_L6 +  
     lag1_L7 + lag2_L7 + lag3_L7 +  
     lag1_L8 + lag2_L8 + lag3_L8 +  
     lag1_A + lag2_A + lag3_A +  
     time + I(time * time),
```

```
### model for CMA/CA size
```

```
L2 ~ X1 + X2 + X3 + X4 +  
     X10 + X12 + X11 + X13 +
```

X5 +  
 X6 + X7 + X8 + I(X9 \* X8) +  
 L1 + lag1\_L1 + lag2\_L1 + lag3\_L1 +  
 lag1\_L2 + lag2\_L2 + lag3\_L2 +  
 lag1\_L3 + lag2\_L3 + lag3\_L3 +  
 lag1\_L4 + lag2\_L4 + lag3\_L4 +  
 lag1\_L5 + lag2\_L5 + lag3\_L5 +  
 lag1\_L6 + lag2\_L6 + lag3\_L6 +  
 lag1\_L7 + lag2\_L7 + lag3\_L7 +  
 lag1\_L8 + lag2\_L8 + lag3\_L8 +  
 lag1\_A + lag2\_A + lag3\_A +  
 time + I(time \* time),

### model for L3 form characteristics

L3 ~ X1 + X2 + X3 + X4 +  
 X10 + X12 + X11 + X13 +  
 X5 +  
 X6 + X7 + X8 + I(X9 \* X8) +  
 L1 + lag1\_L1 + lag2\_L1 + lag3\_L1 +  
 L2 + lag1\_L2 + lag2\_L2 + lag3\_L2 +  
 lag1\_L3 + lag2\_L3 + lag3\_L3 +  
 lag1\_L4 + lag2\_L4 + lag3\_L4 +  
 lag1\_L5 + lag2\_L5 + lag3\_L5 +  
 lag1\_L6 + lag2\_L6 + lag3\_L6 +  
 lag1\_L7 + lag2\_L7 + lag3\_L7 +  
 lag1\_L8 + lag2\_L8 + lag3\_L8 +  
 lag1\_A + lag2\_A + lag3\_A +  
 time + I(time \* time),

### model for income decile

L4 ~ X1 + X2 + X3 + X4 +  
 X10 + X12 + X11 + X13 +  
 X5 +  
 X6 + X7 + X8 + I(X9 \* X8) +  
 L1 + lag1\_L1 + lag2\_L1 + lag3\_L1 +  
 L2 + lag1\_L2 + lag2\_L2 + lag3\_L2 +  
 L3 + lag1\_L3 + lag2\_L3 + lag3\_L3 +  
 lag1\_L4 + lag2\_L4 + lag3\_L4 +  
 lag1\_L5 + lag2\_L5 + lag3\_L5 +  
 lag1\_L6 + lag2\_L6 + lag3\_L6 +  
 lag1\_L7 + lag2\_L7 + lag3\_L7 +  
 lag1\_L8 + lag2\_L8 + lag3\_L8 +  
 lag1\_A + lag2\_A + lag3\_A +  
 time + I(time \* time),



### model for ethnic concentration

L5 ~ X1 + X2 + X3 + X4 +  
X10 + X12 + X11 + X13 +  
X5 +  
X6 + X7 + X8 + I(X9 \* X8) +  
L1 + lag1\_L1 + lag2\_L1 + lag3\_L1 +  
L2 + lag1\_L2 + lag2\_L2 + lag3\_L2 +  
L3 + lag1\_L3 + lag2\_L3 + lag3\_L3 +  
L4 + lag1\_L4 + lag2\_L4 + lag3\_L4 +  
lag1\_L5 + lag2\_L5 + lag3\_L5 +  
lag1\_L6 + lag2\_L6 + lag3\_L6 +  
lag1\_L7 + lag2\_L7 + lag3\_L7 +  
lag1\_L8 + lag2\_L8 + lag3\_L8 +  
lag1\_A + lag2\_A + lag3\_A +  
time + I(time \* time),

### model for material deprivation

L6 ~ X1 + X2 + X3 + X4 +  
X10 + X12 + X11 + X13 +  
X5 +  
X6 + X7 + X8 + I(X9 \* X8) +  
L1 + lag1\_L1 + lag2\_L1 + lag3\_L1 +  
L2 + lag1\_L2 + lag2\_L2 + lag3\_L2 +  
L3 + lag1\_L3 + lag2\_L3 + lag3\_L3 +  
L4 + lag1\_L4 + lag2\_L4 + lag3\_L4 +  
L5 + lag1\_L5 + lag2\_L5 + lag3\_L5 +  
lag1\_L6 + lag2\_L6 + lag3\_L6 +  
lag1\_L7 + lag2\_L7 + lag3\_L7 +  
lag1\_L8 + lag2\_L8 + lag3\_L8 +  
lag1\_A + lag2\_A + lag3\_A +  
time + I(time \* time),

### model for residential instability

L7 ~ X1 + X2 + X3 + X4 +  
X10 + X12 + X11 + X13 +  
X5 +  
X6 + X7 + X8 + I(X9 \* X8) +  
L1 + lag1\_L1 + lag2\_L1 + lag3\_L1 +  
L2 + lag1\_L2 + lag2\_L2 + lag3\_L2 +  
L3 + lag1\_L3 + lag2\_L3 + lag3\_L3 +  
L4 + lag1\_L4 + lag2\_L4 + lag3\_L4 +  
L5 + lag1\_L5 + lag2\_L5 + lag3\_L5 +  
L6 + lag1\_L6 + lag2\_L6 + lag3\_L6 +  
lag1\_L7 + lag2\_L7 + lag3\_L7 +  
lag1\_L8 + lag2\_L8 + lag3\_L8 +

```
lag1_A + lag2_A + lag3_A +  
time + I(time * time),
```

```
### model for dependency
```

```
L8 ~ X1 + X2 + X3 + X4 +  
X10 + X12 + X11 + X13 +  
X5 +  
X6 + X7 + X8 + I(X9 * X8) +  
L1 + lag1_L1 + lag2_L1 + lag3_L1 +  
L2 + lag1_L2 + lag2_L2 + lag3_L2 +  
L3 + lag1_L3 + lag2_L3 + lag3_L3 +  
L4 + lag1_L4 + lag2_L4 + lag3_L4 +  
L5 + lag1_L5 + lag2_L5 + lag3_L5 +  
L6 + lag1_L6 + lag2_L6 + lag3_L6 +  
L7 + lag1_L7 + lag2_L7 + lag3_L7 +  
lag1_L8 + lag2_L8 + lag3_L8 +  
lag1_A + lag2_A + lag3_A +  
time + I(time * time),
```

```
### model for PM2.5 exposure
```

```
A ~ X1 + X2 + X3 + X4 +  
X10 + X12 + X11 + X13 +  
X5 +  
X6 + X7 + X8 + I(X9 * X8) +  
L1 + lag1_L1 + lag2_L1 + lag3_L1 +  
L2 + lag1_L2 + lag2_L2 + lag3_L2 +  
L3 + lag1_L3 + lag2_L3 + lag3_L3 +  
L4 + lag1_L4 + lag2_L4 + lag3_L4 +  
L5 + lag1_L5 + lag2_L5 + lag3_L5 +  
L6 + lag1_L6 + lag2_L6 + lag3_L6 +  
L7 + lag1_L7 + lag2_L7 + lag3_L7 +  
L8 + lag1_L8 + lag2_L8 + lag3_L8 +  
lag1_A + lag2_A + lag3_A +  
time + I(time * time)
```

```
))
```

```
##### Specify intervention functions #####
```

```
### sr_t0_run is for x% incremental mitigation strategy
```

```
sr_t0_run <- function(newdf, pool, intvar, intvals, time_name, t) {  
  prop_reduce <- intvals[[2]]  
  n_red <- (1 / prop_reduce) - 1  
  src_name <- paste0("p_", intvals[[1]], "_", t)
```

```

if (t >= 0 & t <= n_red) {
  newdf[, (intvar) := log(exp(get(intvar)) - (exp(get(intvar)) * (get(src_name) * prop_reduce)))]
}
if (t == (n_red + 1)) {
  newdf[, (intvar) := log(exp(get(intvar)) - (exp(get(intvar)) *
    (get(src_name) * (get(src_name) *
      (1 %% prop_reduce)))))]
}
}
}

```

### sr\_phased\_50 is for 50% phased mitigation strategy

```

sr_phased_50 <- function(newdf, pool, intvar, intvals, time_name, t) {
  src_name <- paste0("p_", intvals[[1]], "_", t)
  prop_reduce <- 0.5

  ## set intervention at time = 0 and time = 5
  if (t == 0 | t == 5) {
    newdf[, (intvar) := log(exp(get(intvar)) - (exp(get(intvar)) * (get(src_name) * prop_reduce)))]
  }
}

```

### sr\_phased\_25 is for 25% phased mitigation strategy

```

sr_phased_25 <- function(newdf, pool, intvar, intvals, time_name, t) {
  src_name <- paste0("p_", intvals[[1]], "_", t)
  prop_reduce <- 0.25

  ## set intervention at time = 0, 3, 6, and 9
  if (t == 0 | t == 3 | t == 6 | t == 9) {
    newdf[, (intvar) := log(exp(get(intvar)) - (exp(get(intvar)) * (get(src_name) * prop_reduce)))]
  }
}

```

### sr\_t0 is idealistic zero-out mitigation strategy

```

sr_t0 <- function(newdf, pool, intvar, intvals, time_name, t) {
  prop_reduce <- intvals[[2]]

  ## set intervention at time = 0
  if (t == 0) {
    src_name <- paste0("p_", intvals[[1]], "_", t)
    newdf[, (intvar) := log(exp(get(intvar)) - (exp(get(intvar)) * (get(src_name) * prop_reduce)))]
  }
}

```

### specify interventions (use agriculture “AG” as an example)

```

interventions <- list(

  ### 25% incremental interventions
  list(c(sr_t0_run, "AG", 0.25))
)

### specify names for the interventions
pnames_int <- c('p_AG')
int_descript <- c(paste0("inc25_", pnames_int))

### specify variable that is intervened upon
intvars <- list("A")

##### Specify customized lag function and convert to factor #####

lag1_round <- function(pool, histvars, time_name, t, id_name){

  current_ids <- unique(pool[get(time_name)==t][[id_name]])

  lapply(histvars, FUN = function(histvar) {
    i <- 1

    pool[get(time_name)==t,
         (paste0("lag1_round_", histvar)) :=
         ifelse((round(tapply(pool[get(id_name) %in% current_ids &
                               get(time_name) == t-i][[histvar]],
                               pool[get(id_name) %in% current_ids &
                               get(time_name) == t-i][[id_name]],
                               FUN=min), 0)) >= 1,
                 round(tapply(pool[get(id_name) %in% current_ids &
                               get(time_name) == t-i][[histvar]],
                               pool[get(id_name) %in% current_ids &
                               get(time_name) == t-i][[id_name]],
                               FUN=min), 0),
                 1)]
  })
}

lag2_round <- function(pool, histvars, time_name, t, id_name){

  current_ids <- unique(pool[get(time_name)==t][[id_name]])

  lapply(histvars, FUN = function(histvar) {
    i <- 2

```

```

pool[get(time_name)==t,
  (paste0("lag2_round_", histvar)) :=
  ifelse((round(tapply(pool[get(id_name) %in% current_ids &
    get(time_name) == t-i][[histvar]],
    pool[get(id_name) %in% current_ids &
    get(time_name) == t-i][[id_name]],
    FUN=min), 0)) >= 1,
  round(tapply(pool[get(id_name) %in% current_ids &
    get(time_name) == t-i][[histvar]],
    pool[get(id_name) %in% current_ids &
    get(time_name) == t-i][[id_name]],
    FUN=min), 0),
  1)]
})
}

```

```
lag3_round <- function(pool, histvars, time_name, t, id_name){
```

```
  current_ids <- unique(pool[get(time_name)==t][[id_name]])
```

```
  lapply(histvars, FUN = function(histvar) {
    i <- 3
```

```

    pool[get(time_name)==t,
      (paste0("lag3_round_", histvar)) :=
      ifelse((round(tapply(pool[get(id_name) %in% current_ids &
        get(time_name) == t-i][[histvar]],
        pool[get(id_name) %in% current_ids &
        get(time_name) == t-i][[id_name]],
        FUN=min), 0)) >= 1,
      round(tapply(pool[get(id_name) %in% current_ids &
        get(time_name) == t-i][[histvar]],
        pool[get(id_name) %in% current_ids &
        get(time_name) == t-i][[id_name]],
        FUN=min), 0),
      1)]
    })
  }

```

```
##### Set baseline covariates #####
```

```

basecovs.all <- c("X1", "X2", "X3", "X4", "X10",
  "X12", "X11", "X13", "X5", "X8", "X6",
  "X9", "X7", paste0("p_AG_", 0:9))

```

```

##### Run gformula model #####
gf <- gformula_survival(
  obs_data = dt,
  id = "person_id",
  time_points = time_points,
  time_name = "time",
  covnames = covnames,
  outcome_name = "Y",
  ymodel = outcome_model,
  covtypes = covtypes,
  covparams = tv_cov_models,
  intvars = intvars,
  ref_int = 0,
  interventions = interventions,
  int_descript = int_descript,
  histories = c(lagged, lag1_round, lag2_round, lag3_round),
  histvars = list(covnames,
    c("L1", "L2", "L3",
      "L4", "L5",
      "L6", "L7", "L8"),
    c("L1", "L2", "L3",
      "L4", "L5",
      "L6", "L7", "L8"),
    c("L1", "L2", "L3",
      "L4", "L5",
      "L6", "L7", "L8")),
  basecovs = basecovs.all,
  sim_data_b = TRUE,
  nsimul = 10000,
  seed = 1234)

```

**Table S1.** Illustration of hypothetical intervention strategies that reduce source contributions to ambient PM<sub>2.5</sub> in Canada over the period of 2007 to 2016, by years and intervention strategies

| <b>Intervention strategies</b> | <b>Annual reduction in observed source contributions to PM<sub>2.5</sub> from a source *</b> |             |             |             |             |             |             |             |             |             |
|--------------------------------|----------------------------------------------------------------------------------------------|-------------|-------------|-------------|-------------|-------------|-------------|-------------|-------------|-------------|
|                                | <b>2007</b>                                                                                  | <b>2008</b> | <b>2009</b> | <b>2010</b> | <b>2011</b> | <b>2012</b> | <b>2013</b> | <b>2014</b> | <b>2015</b> | <b>2016</b> |
| 25% phased                     | 25%                                                                                          | 25%         | 25%         | 50%         | 50%         | 50%         | 75%         | 75%         | 75%         | 100%        |
| 50% phased                     | 50%                                                                                          | 50%         | 50%         | 50%         | 50%         | 100%        | 100%        | 100%        | 100%        | 100%        |
| 10% incremental                | 10%                                                                                          | 20%         | 30%         | 40%         | 50%         | 60%         | 70%         | 80%         | 90%         | 100%        |
| 25% incremental                | 25%                                                                                          | 50%         | 75%         | 100%        | 100%        | 100%        | 100%        | 100%        | 100%        | 100%        |
| 50% incremental                | 50%                                                                                          | 100%        | 100%        | 100%        | 100%        | 100%        | 100%        | 100%        | 100%        | 100%        |
| zero out                       | 100%                                                                                         | 100%        | 100%        | 100%        | 100%        | 100%        | 100%        | 100%        | 100%        | 100%        |

\* Relative to the natural course of observed source contributions from a specified emission source

**Table S2.** Summary of covariates in the analysis of emission mitigation and mortality with the 2006 CanCHEC and *g*-formula

| <b>Variables</b>                                         | <b>Years assessed</b> | <b>Type of variable when used as predictor</b>                                                   | <b>Type of variable when used as dependent variable</b> |
|----------------------------------------------------------|-----------------------|--------------------------------------------------------------------------------------------------|---------------------------------------------------------|
| Age                                                      | 2006                  | 1-year category *                                                                                | Not predicted                                           |
| Sex                                                      | 2006                  | Indicator                                                                                        | Not predicted                                           |
| Race/ethnicity                                           | 2006                  | Indicator                                                                                        | Not predicted                                           |
| Indigenous identity                                      | 2006                  | Indicator                                                                                        | Not predicted                                           |
| Landed immigrant                                         | 2006                  | An indicator for immigrant (y/n) and a continuous variable for years since immigration to Canada | Not predicted                                           |
| Marital status                                           | 2006                  | 6 categories                                                                                     | Not predicted                                           |
| Education                                                | 2006                  | 4 categories                                                                                     | Not predicted                                           |
| Employment                                               | 2006                  | 3 categories                                                                                     | Not predicted                                           |
| Occupation                                               | 2006                  | 6 categories                                                                                     | Not predicted                                           |
| Time (years since baseline)                              | All                   | A linear term and a quadratic term                                                               | Not predicted                                           |
| Annual household income                                  | All                   | 10 categories †                                                                                  | Continuous (bounded normal)                             |
| Urban form characteristics                               | All                   | 5 categories †                                                                                   | Continuous (bounded normal)                             |
| Community size                                           | All                   | 6 categories †                                                                                   | Continuous (bounded normal)                             |
| Airshed                                                  | All                   | 6 categories †                                                                                   | Continuous (bounded normal)                             |
| Neighborhood material deprivation                        | All                   | 5 categories †                                                                                   | Continuous (bounded normal)                             |
| Neighborhood dependency                                  | All                   | 5 categories †                                                                                   | Continuous (bounded normal)                             |
| Neighborhood residential instability                     | All                   | 5 categories †                                                                                   | Continuous (bounded normal)                             |
| Neighborhood ethnic concentration                        | All                   | 5 categories †                                                                                   | Continuous (bounded normal)                             |
| Annual PM <sub>2.5</sub> (natural logarithm transformed) | All                   | Continuous (normal)                                                                              | Continuous (normal)                                     |
| Nonaccidental death (outcome)                            | All                   | -                                                                                                | Time to event (pooled logistic)                         |

\* Restricted cubic spline function with 5 knots in all analyses, with the exception of analyses stratified by age in which it used 3 knots.

† Fitted as a categorical variable in the outcome model, whereas fitted as a continuous variable in the covariate models.



**Table S3.** Shape Constrained Health Impact Function outputs from 20 potential shapes of PM<sub>2.5</sub>-mortality association examined

| Location | mu       | Coeffect    | Standard error | tau | AIC                | Model form   |
|----------|----------|-------------|----------------|-----|--------------------|--------------|
| 0        | 3.33E-07 | 0.013758586 | 0.001610607    | 0.1 | 2098016.314        | z*logit      |
| 25       | 5.066667 | 0.009400996 | 0.001242146    | 0.1 | 2098031.985        | z*logit      |
| 50       | 6.719052 | 0.007373060 | 0.001170288    | 0.1 | 2098049.578        | z*logit      |
| 75       | 8.366667 | 0.005984167 | 0.001224286    | 0.1 | 2098065.372        | z*logit      |
| 0        | 3.33E-07 | 0.156753366 | 0.016322073    | 0.1 | 2097996.869        | log(z)*logit |
| 25       | 5.066667 | 0.089558889 | 0.010705904    | 0.1 | 2098019.218        | log(z)*logit |
| 50       | 6.719052 | 0.068149780 | 0.009877653    | 0.1 | 2098041.647        | log(z)*logit |
| 75       | 8.366667 | 0.054302063 | 0.010275815    | 0.1 | 2098061.335        | log(z)*logit |
| 0        | 3.33E-07 | 0.012744721 | 0.001560701    | 0.2 | 2098022.619        | z*logit      |
| 25       | 5.066667 | 0.010767467 | 0.001494651    | 0.2 | 2098037.422        | z*logit      |
| 50       | 6.719052 | 0.010337010 | 0.001547356    | 0.2 | 2098044.696        | z*logit      |
| 75       | 8.366667 | 0.010331821 | 0.001682928    | 0.2 | 2098051.639        | z*logit      |
| 0        | 3.33E-07 | 0.139854219 | 0.015296147    | 0.2 | 2098005.589        | log(z)*logit |
| 25       | 5.066667 | 0.108444057 | 0.013546337    | 0.2 | 2098025.189        | log(z)*logit |
| 50       | 6.719052 | 0.101785116 | 0.013777825    | 0.2 | 2098034.724        | log(z)*logit |
| 75       | 8.366667 | 0.099889509 | 0.014803401    | 0.2 | 2098043.785        | log(z)*logit |
| 5        | 3.143111 | 0.120384691 | 0.012754868    | 0.1 | 2098000.025        | log(z)*logit |
| -5       | -3.14311 | 0.166020730 | 0.017572047    | 0.1 | 2097999.873        | log(z)*logit |
| - *      | -        | 0.014085478 | 0.001678212    | -   | 2098018.857        | log-linear   |
| - *      | -        | 0.108517703 | 0.010948828    | -   | <b>2097990.713</b> | log-log      |

\* Two parameters, mu and tau, are not required for outcome regression under the assumption of log-log or log-linear shape for PM<sub>2.5</sub>-mortality relationship

**Table S4.** Selected advantages and disadvantages of the g-formula approach compared with the traditional Cox model approach

| <b>Selected differences</b>                                       | <b>Cox model</b>   | <b>g-formula</b>          |
|-------------------------------------------------------------------|--------------------|---------------------------|
| Evaluate any interventions ( <i>e.g.</i> , sustained and dynamic) | No                 | Yes                       |
| Scale of effect measure                                           | Multiplicative     | Additive and multiplicate |
| Conditional or marginal effect measure                            | Conditional        | Marginal                  |
| Identifiability assumptions                                       | Less explicit      | More explicit             |
| Overcome exposure-confounder feedback *                           | No                 | Yes                       |
| Subject to built-in selection bias **                             | Yes                | No                        |
| Subject to non-collapsibility issue                               | Yes                | No                        |
| Transportability ***                                              | More transportable | Less transportable        |
| Easy to implement                                                 | Yes                | No                        |
| Computational constraint                                          | Low to moderate    | High                      |

\* A confounder affects exposure and the exposure affects the confounder

\*\* A bias arising from conditioning on being free of the outcome during the follow-up. Because being free of outcome can be a common effect of the exposure of interest and frailty (a common but unobserved cause of future outcome), this opens an associational path between the exposure and future outcome, introducing a bias in the effect measure (*e.g.*, hazard ratio).

\*\*\* Transportability of causal effects with air pollution relies on a mix of causal effect modifiers such as age and SES among populations. The estimated effect measures using the g-formula from Canada may be more transportable to other high-income countries than low- and mid-income countries.

**Table S5.** Baseline characteristics of study population (count, percent, or mean  $\pm$  SD, total N = 2,663,645)

| Baseline Characteristics           | Cohort          |      |
|------------------------------------|-----------------|------|
|                                    | N=2,663,645 *   | %    |
| <i>Demographic characteristics</i> |                 |      |
| Person years, y                    | 25,730,790      | 100  |
| Age, y                             | 50.9 $\pm$ 12.8 | -    |
| Sex                                |                 |      |
| Male                               | 1,293,890       | 48.6 |
| Female                             | 1,369,755       | 51.4 |
| Race/ethnicity                     |                 |      |
| White or Indigenous                | 2,383,790       | 89.5 |
| Visible minority                   | 279,855         | 10.5 |
| Indigenous identity                |                 |      |
| Not Indigenous                     | 2,540,545       | 95.4 |
| Aboriginal                         | 123,100         | 4.6  |
| Landed immigrant                   |                 |      |
| Lived in Canada for 6-10 years     | 80,935          | 3.0  |
| Lived in Canada for 11-20 years    | 136,980         | 5.1  |
| Lived in Canada for >20 years      | 335,465         | 12.6 |
| Marital status                     |                 |      |
| Single                             | 308,865         | 11.6 |
| Common-law                         | 298,740         | 11.2 |
| Married                            | 1,662,825       | 62.4 |
| Separated                          | 80,770          | 3.0  |
| Divorced                           | 190,815         | 7.2  |
| Widowed                            | 121,630         | 4.6  |
| Education                          |                 |      |
| Less than high school              | 542,060         | 20.4 |
| High school                        | 964,700         | 36.2 |
| Post-secondary non-university      | 638,165         | 24.0 |
| University                         | 518,720         | 19.5 |
| Employment                         |                 |      |
| Employed                           | 1,744,340       | 65.5 |
| Unemployed                         | 90,440          | 3.4  |
| Not in labor force                 | 828,865         | 31.1 |
| Occupation                         |                 |      |
| Management                         | 225,175         | 8.5  |

| Baseline Characteristics                      | Cohort        |      |
|-----------------------------------------------|---------------|------|
|                                               | N=2,663,645 * | %    |
| Professional                                  | 355,255       | 13.3 |
| Skilled                                       | 602,075       | 22.6 |
| Semi-skilled                                  | 571,250       | 21.5 |
| Unskilled                                     | 187,320       | 7.0  |
| Not applicable                                | 722,570       | 27.1 |
| Household income adequacy †                   |               |      |
| 1st decile - lowest                           | 234,020       | 8.8  |
| 2nd decile                                    | 250,245       | 9.4  |
| 3rd decile                                    | 260,760       | 9.8  |
| 4th decile                                    | 268,645       | 10.1 |
| 5th decile                                    | 273,045       | 10.3 |
| 6th decile                                    | 275,025       | 10.3 |
| 7th decile                                    | 274,415       | 10.3 |
| 8th decile                                    | 274,000       | 10.3 |
| 9th decile                                    | 272,925       | 10.2 |
| 10th decile - highest                         | 280,565       | 10.5 |
| <b><i>Environmental characteristics</i></b>   |               |      |
| Urban form characteristics                    |               |      |
| Active urban core                             | 203,110       | 7.6  |
| Transit-reliant suburb                        | 180,310       | 6.8  |
| Car-reliant suburb                            | 1,136,480     | 42.7 |
| Exurban                                       | 154,455       | 5.8  |
| Non-CMA/CA ‡                                  | 989,290       | 37.1 |
| CMA/CA size                                   |               |      |
| Pop: ≥1,500,000 §                             | 806,390       | 30.3 |
| Pop: 500,000–1,499,999                        | 415,150       | 15.6 |
| Pop: 100,000–499,999                          | 498,795       | 18.7 |
| Pop: 30,000–99,999                            | 264,745       | 9.95 |
| Pop: 10,000–29,000                            | 100,240       | 3.8  |
| Non-CMA/CA                                    | 578,325       | 21.7 |
| Airshed                                       |               |      |
| Western                                       | 331,160       | 12.4 |
| Prairie                                       | 354,705       | 13.3 |
| Western Central                               | 151,315       | 5.7  |
| East Central                                  | 1,557,790     | 58.5 |
| South Atlantic                                | 245,770       | 9.2  |
| Northern                                      | 22,905        | 0.9  |
| <b><i>Social-economic characteristics</i></b> |               |      |

| Baseline Characteristics | Cohort        |      |
|--------------------------|---------------|------|
|                          | N=2,663,645 * | %    |
| Dependency               |               |      |
| 1st quintile - lowest    | 477,010       | 17.9 |
| 2nd quintile             | 443,710       | 16.7 |
| 3rd quintile             | 429,755       | 16.1 |
| 4th quintile             | 537,020       | 20.2 |
| 5th quintile - highest   | 776,150       | 29.1 |
| Material deprivation     |               |      |
| 1st quintile - lowest    | 549,700       | 20.6 |
| 2nd quintile             | 513,105       | 19.3 |
| 3rd quintile             | 531,545       | 20.0 |
| 4th quintile             | 454,770       | 17.1 |
| 5th quintile - highest   | 614,525       | 23.1 |
| Residential instability  |               |      |
| 1st quintile - lowest    | 624,005       | 23.4 |
| 2nd quintile             | 709,620       | 26.6 |
| 3rd quintile             | 535,990       | 20.1 |
| 4th quintile             | 462,855       | 17.4 |
| 5th quintile - highest   | 331,175       | 12.4 |
| Ethnic concentration     |               |      |
| 1st quintile - lowest    | 841,290       | 31.6 |
| 2nd quintile             | 662,200       | 24.9 |
| 3rd quintile             | 467,215       | 17.5 |
| 4th quintile             | 361,700       | 13.6 |
| 5th quintile - highest   | 331,240       | 12.4 |

\* All counts were rounded up to the nearest five in compliance with privacy requirements by Statistics Canada.

† Household income adequacy is an index used by Statistics Canada that accounts for total household income and household size.

‡ CMA/CA: census metropolitan area/census agglomeration area.

§ Pop: population.

|| From Canadian Census, at the census dissemination area level, the smallest standard geographic area for which all census data are disseminated in Canada.

**Table S6.** Absolute change in mortality risk (per million population) and 95% confidence interval (95% CI) for the associations of PM<sub>2.5</sub> reduction with premature mortality in Canada over the period 2007-2016, by years, emission sources, and intervention strategies relative to the natural course of observed PM<sub>2.5</sub> exposures (‘no intervention’ scenario)

| Sources          |                         | Interventions           |                         |                         |                         |                         |
|------------------|-------------------------|-------------------------|-------------------------|-------------------------|-------------------------|-------------------------|
|                  | Zero out                | 50% incremental         | 25% incremental         | 10% incremental         | 50% phased              | 25% phased              |
| Agriculture      |                         |                         |                         |                         |                         |                         |
| 2007             | 0                       | 0                       | 0                       | 0                       | 0                       | 0                       |
| 2008             | -26.0 (-31.3, -20.8)    | -12.9 (-15.5, -10.3)    | -6.4 (-7.7, -5.1)       | -2.6 (-3.1, -2)         | -12.9 (-15.5, -10.3)    | -6.4 (-7.7, -5.1)       |
| 2009             | -73.9 (-87.3, -60.5)    | -51.0 (-60.2, -41.9)    | -25.3 (-29.9, -20.7)    | -10.2 (-12, -8.3)       | -36.4 (-43.0, -29.8)    | -18.0 (-21.4, -14.6)    |
| 2010             | -134.2 (-157.5, -110.9) | -102.6 (-120.2, -85.0)  | -57.1 (-67.1, -47.1)    | -22.9 (-26.9, -18.9)    | -65.3 (-76.9, -53.8)    | -31.8 (-37.5, -26.0)    |
| 2011             | -171.8 (-202.0, -141.5) | -145.4 (-172.0, -118.9) | -94.2 (-111.9, -76.4)   | -37.5 (-44.6, -30.5)    | -83.8 (-98.7, -69.0)    | -47.5 (-56.1, -38.8)    |
| 2012             | -204.3 (-242.1, -166.4) | -178.9 (-213.3, -144.6) | -132.1 (-158.4, -105.7) | -55.5 (-66.8, -44.2)    | -99.6 (-118.1, -81.1)   | -64.6 (-77.4, -51.8)    |
| 2013             | -227.7 (-272.0, -183.5) | -203.4 (-244.2, -162.6) | -161.0 (-195.0, -126.9) | -70.8 (-86.1, -55.5)    | -120.7 (-145.1, -96.3)  | -78.9 (-95.3, -62.4)    |
| 2014             | -243.6 (-293.5, -193.8) | -221.6 (-267.4, -175.8) | -182.2 (-221.7, -142.6) | -89.0 (-109.2, -68.8)   | -143.2 (-173.8, -112.7) | -95.8 (-116.6, -75.0)   |
| 2015             | -252.8 (-306.0, -199.6) | -232.0 (-281.0, -182.9) | -195.7 (-241.7, -149.7) | -103.9 (-130.7, -77.2)  | -163.2 (-203.4, -122.9) | -108.7 (-135.9, -81.5)  |
| 2016             | -255.4 (-312.7, -198.1) | -235.3 (-290.6, -180.0) | -202.8 (-254.3, -151.4) | -114.8 (-148.9, -80.7)  | -173.9 (-220.5, -127.2) | -118.1 (-151.8, -84.3)  |
| Industry         |                         |                         |                         |                         |                         |                         |
| 2007             | 0                       | 0                       | 0                       | 0                       | 0                       | 0                       |
| 2008             | -36.9 (-44.4, -29.3)    | -18.3 (-22, -14.5)      | -9.1 (-10.9, -7.2)      | -3.6 (-4.4, -2.9)       | -18.3 (-22, -14.5)      | -9.1 (-10.9, -7.2)      |
| 2009             | -106.2 (-125.1, -87.2)  | -73.3 (-86.4, -60.1)    | -36.2 (-42.6, -29.8)    | -14.5 (-17.1, -11.9)    | -52.2 (-61.6, -42.8)    | -25.7 (-30.2, -21.1)    |
| 2010             | -193.8 (-227.0, -160.5) | -147.8 (-172.8, -122.8) | -82.7 (-96.8, -68.6)    | -32.6 (-38.4, -26.9)    | -94.4 (-110.5, -78.3)   | -46.0 (-54.2, -37.7)    |
| 2011             | -247.8 (-292.1, -203.6) | -208.7 (-246.8, -170.6) | -135.8 (-161.8, -109.9) | -53.8 (-64.0, -43.6)    | -120.7 (-141.9, -99.5)  | -68.5 (-81.1, -55.9)    |
| 2012             | -294.7 (-349.1, -240.2) | -257.0 (-305.4, -208.6) | -189.5 (-227.4, -151.5) | -79.4 (-95.6, -63.2)    | -143.1 (-169.9, -116.3) | -92.8 (-111.4, -74.2)   |
| 2013             | -327.9 (-390.3, -265.5) | -292.2 (-350.0, -234.3) | -232.1 (-281.2, -183.0) | -102.3 (-124.4, -80.1)  | -174.3 (-208.8, -139.9) | -114.1 (-137.9, -90.2)  |
| 2014             | -353.2 (-425.1, -281.2) | -319.1 (-384.0, -254.1) | -264.3 (-320.3, -208.2) | -126.4 (-154.7, -98.1)  | -208.1 (-251.8, -164.5) | -137.0 (-166.7, -107.3) |
| 2015             | -366.2 (-442.3, -290.2) | -333.8 (-403.9, -263.7) | -282.8 (-349.0, -216.7) | -149.0 (-187.6, -110.4) | -236.8 (-294.1, -179.5) | -156.1 (-195.3, -117.0) |
| 2016             | -369.3 (-452.3, -286.4) | -339.0 (-418.3, -259.6) | -291.6 (-365.2, -218.0) | -164.7 (-213.4, -116.0) | -250.2 (-316.2, -184.2) | -170.0 (-216.9, -123.1) |
| Power generation |                         |                         |                         |                         |                         |                         |
| 2007             | 0                       | 0                       | 0                       | 0                       | 0                       | 0                       |
| 2008             | -20.2 (-24.4, -16.0)    | -10 (-12.1, -8.0)       | -5.0 (-6.0, -4.0)       | -2.0 (-2.4, -1.6)       | -10.0 (-12.1, -8.0)     | -5.0 (-6.0, -4.0)       |
| 2009             | -58.5 (-69.1, -47.9)    | -40.5 (-47.7, -33.4)    | -20.1 (-23.7, -16.4)    | -8.0 (-9.5, -6.5)       | -28.8 (-34.0, -23.6)    | -14.2 (-16.9, -11.5)    |
| 2010             | -106.1 (-124.4, -87.7)  | -81.4 (-95.4, -67.4)    | -45.4 (-53.4, -37.3)    | -18.2 (-21.4, -14.9)    | -51.7 (-60.7, -42.7)    | -25.3 (-29.9, -20.7)    |
| 2011             | -135.0 (-159.4, -110.6) | -115.3 (-136.8, -93.8)  | -74.7 (-89.0, -60.4)    | -29.6 (-35.3, -23.9)    | -66.3 (-78.3, -54.3)    | -37.7 (-44.7, -30.7)    |
| 2012             | -159.4 (-189.5, -129.4) | -140.9 (-168.6, -113.2) | -104.9 (-126.0, -83.7)  | -43.9 (-52.8, -34.9)    | -78.7 (-93.8, -63.5)    | -51.6 (-61.9, -41.3)    |

|                        |                         |                         |                         |                         |                         |                         |
|------------------------|-------------------------|-------------------------|-------------------------|-------------------------|-------------------------|-------------------------|
| 2013                   | -178.4 (-213.1, -143.7) | -160.5 (-192.5, -128.5) | -128.1 (-155.2, -101.0) | -55.9 (-68.3, -43.5)    | -95.1 (-114.6, -75.6)   | -62.4 (-75.9, -48.9)    |
| 2014                   | -191.1 (-230.2, -151.9) | -174.8 (-210.3, -139.3) | -144.4 (-175.1, -113.7) | -69.3 (-85.1, -53.4)    | -112.1 (-136.0, -88.2)  | -74.7 (-91.1, -58.3)    |
| 2015                   | -198.1 (-239.7, -156.6) | -183.1 (-222.3, -143.9) | -155.3 (-191.3, -119.3) | -81.8 (-103.1, -60.5)   | -129.6 (-160.7, -98.5)  | -85.8 (-107.1, -64.4)   |
| 2016                   | -201.4 (-247.1, -155.6) | -185.9 (-229.9, -141.8) | -160.7 (-201.7, -119.7) | -90.3 (-117.4, -63.3)   | -136.8 (-173.4, -100.0) | -92.9 (-119.4, -66.4)   |
| Residential combustion | Zero out                | 50% Incremental         | 25% Incremental         | 10% Incremental         | 50% Phased              | 25% Phased              |
| 2007                   | 0                       | 0                       | 0                       | 0                       | 0                       | 0                       |
| 2008                   | -35.7 (-43, -28.4)      | -17.7 (-21.3, -14.0)    | -8.8 (-10.6, -7.0)      | -3.5 (-4.2, -2.8)       | -17.7 (-21.3, -14.0)    | -8.8 (-10.6, -7.0)      |
| 2009                   | -104.7 (-123.2, -86.2)  | -72.8 (-85.6, -59.9)    | -36.1 (-42.5, -29.8)    | -14.2 (-16.7, -11.7)    | -51.7 (-61.0, -42.4)    | -25.6 (-30.1, -21.0)    |
| 2010                   | -195.3 (-228.7, -161.9) | -148.3 (-173.4, -123.2) | -83.0 (-97.2, -68.9)    | -32.8 (-38.6, -26.9)    | -94.2 (-110.4, -77.9)   | -46.1 (-54.2, -37.9)    |
| 2011                   | -251.3 (-296.0, -206.6) | -209.3 (-248.2, -170.4) | -135.8 (-161.8, -109.9) | -53.9 (-64.2, -43.6)    | -120.8 (-142.2, -99.4)  | -68.5 (-81.0, -56.0)    |
| 2012                   | -300.0 (-355.3, -244.8) | -258.0 (-307.3, -208.7) | -189.7 (-227.2, -152.2) | -78.8 (-94.7, -62.9)    | -143.0 (-169.6, -116.5) | -92.6 (-110.0, -74.0)   |
| 2013                   | -335.9 (-399.2, -272.6) | -294.9 (-353.1, -236.7) | -231.4 (-280.5, -182.3) | -103 (-125.3, -80.7)    | -174.3 (-208.8, -139.8) | -114.8 (-139.0, -90.6)  |
| 2014                   | -362.2 (-433.7, -290.6) | -322.9 (-387.9, -257.9) | -264.6 (-321.0, -208.2) | -127.8 (-156.9, -98.7)  | -207.7 (-251.2, -164.1) | -138.3 (-168.1, -108.5) |
| 2015                   | -377.6 (-455.5, -299.7) | -339.1 (-410.5, -267.6) | -285.0 (-350.5, -219.5) | -149.9 (-187.8, -112.0) | -238.6 (-295.2, -182.1) | -157.1 (-195.6, -118.6) |
| 2016                   | -384.5 (-470.5, -298.6) | -346.0 (-426.2, -265.7) | -295.5 (-369.1, -221.8) | -164.9 (-214.1, -115.7) | -253.3 (-319.4, -187.3) | -169.3 (-216.7, -121.8) |
| Transport              | Zero out                | 50% Incremental         | 25% Incremental         | 10% Incremental         | 50% Phased              | 25% Phased              |
| 2007                   | 0                       | 0                       | 0                       | 0                       | 0                       | 0                       |
| 2008                   | -38.9 (-46.8, -30.9)    | -19.2 (-23.1, -15.3)    | -9.6 (-11.5, -7.6)      | -3.8 (-4.6, -3.0)       | -19.2 (-23.1, -15.3)    | -9.6 (-11.5, -7.6)      |
| 2009                   | -112.0 (-132.0, -92.1)  | -77.4 (-91.3, -63.5)    | -38.3 (-45.1, -31.6)    | -15.2 (-18.0, -12.5)    | -55.1 (-65.1, -45.1)    | -27.2 (-32.1, -22.3)    |
| 2010                   | -206.2 (-241.7, -170.6) | -156.2 (-182.6, -129.8) | -87.6 (-102.6, -72.7)   | -34.8 (-41.0, -28.5)    | -100.2 (-117.5, -82.9)  | -48.9 (-57.6, -40.2)    |
| 2011                   | -262.9 (-309.7, -216.1) | -221.7 (-262.8, -180.7) | -144.0 (-171.3, -116.6) | -57.3 (-68.1, -46.4)    | -128.5 (-150.8, -106.0) | -72.6 (-85.8, -59.4)    |
| 2012                   | -313.7 (-371.5, -255.9) | -272.5 (-324.4, -220.6) | -200.8 (-240.6, -161.0) | -84.1 (-101.3, -66.8)   | -152.0 (-180.5, -123.5) | -98.9 (-118.6, -79.1)   |
| 2013                   | -351.4 (-418.4, -284.4) | -311.0 (-371.9, -250.1) | -246.3 (-298.3, -194.0) | -109.0 (-132.5, -85.5)  | -185.0 (-221.7, -148.3) | -121.9 (-147.5, -96.2)  |
| 2014                   | -377.4 (-452.6, -302.1) | -338.7 (-407.5, -270.0) | -280.0 (-339.8, -220.2) | -134.5 (-165.1, -103.0) | -220.0 (-266.7, -173.2) | -145.6 (-177.1, -114.1) |
| 2015                   | -391.2 (-471.8, -310.7) | -353.4 (-428.6, -278.2) | -300.0 (-370.6, -229.4) | -157.8 (-198.4, -117.0) | -252.1 (-313.3, -190.9) | -166.2 (-207.5, -125.0) |
| 2016                   | -395.9 (-484.1, -307.6) | -360.3 (-444.2, -276.4) | -310.5 (-388.6, -232.4) | -174.7 (-226.1, -123.0) | -266.4 (-336.3, -196.4) | -180.1 (-230.9, -129.4) |

**Table S7.** Mean percentage change in mortality risk and 95% confidence interval (95% CI) for the associations of PM<sub>2.5</sub> reduction with premature mortality in Canada over the period 2007-2016, by years, emission sources, and intervention strategies relative to the natural course of observed PM<sub>2.5</sub> exposures ('no intervention' scenario)

| Sources          |                      | Interventions        |                      |                      |                      |                      |  |
|------------------|----------------------|----------------------|----------------------|----------------------|----------------------|----------------------|--|
| Agriculture      | Zero out             | 50% Incremental      | 25% Incremental      | 10% Incremental      | 50% Phased           | 25% Phased           |  |
| 2007             | 1                    | 1                    | 1                    | 1                    | 1                    | 1                    |  |
| 2008             | -0.2% (-0.3%, -0.2%) | -0.1% (-0.1%, -0.1%) | -0.1% (-0.1%, 0%)    | 0% (0%, 0%)          | -0.1% (-0.1%, -0.1%) | -0.1% (-0.1%, 0%)    |  |
| 2009             | -0.4% (-0.5%, -0.3%) | -0.3% (-0.3%, -0.2%) | -0.1% (-0.2%, -0.1%) | -0.1% (-0.1%, 0%)    | -0.2% (-0.2%, -0.2%) | -0.1% (-0.1%, -0.1%) |  |
| 2010             | -0.5% (-0.6%, -0.4%) | -0.4% (-0.5%, -0.3%) | -0.2% (-0.3%, -0.2%) | -0.1% (-0.1%, -0.1%) | -0.3% (-0.3%, -0.2%) | -0.1% (-0.1%, -0.1%) |  |
| 2011             | -0.5% (-0.6%, -0.4%) | -0.4% (-0.5%, -0.4%) | -0.3% (-0.3%, -0.2%) | -0.1% (-0.1%, -0.1%) | -0.3% (-0.3%, -0.2%) | -0.1% (-0.2%, -0.1%) |  |
| 2012             | -0.5% (-0.6%, -0.4%) | -0.5% (-0.5%, -0.4%) | -0.3% (-0.4%, -0.3%) | -0.1% (-0.2%, -0.1%) | -0.3% (-0.3%, -0.2%) | -0.2% (-0.2%, -0.1%) |  |
| 2013             | -0.5% (-0.6%, -0.4%) | -0.4% (-0.5%, -0.3%) | -0.3% (-0.4%, -0.3%) | -0.2% (-0.2%, -0.1%) | -0.3% (-0.3%, -0.2%) | -0.2% (-0.2%, -0.1%) |  |
| 2014             | -0.4% (-0.5%, -0.4%) | -0.4% (-0.5%, -0.3%) | -0.3% (-0.4%, -0.3%) | -0.2% (-0.2%, -0.1%) | -0.3% (-0.3%, -0.2%) | -0.2% (-0.2%, -0.1%) |  |
| 2015             | -0.4% (-0.5%, -0.3%) | -0.4% (-0.5%, -0.3%) | -0.3% (-0.4%, -0.2%) | -0.2% (-0.2%, -0.1%) | -0.3% (-0.3%, -0.2%) | -0.2% (-0.2%, -0.1%) |  |
| 2016             | -0.4% (-0.5%, -0.3%) | -0.3% (-0.4%, -0.3%) | -0.3% (-0.4%, -0.2%) | -0.2% (-0.2%, -0.1%) | -0.3% (-0.3%, -0.2%) | -0.2% (-0.2%, -0.1%) |  |
| Industry         | Zero out             | 50% Incremental      | 25% Incremental      | 10% Incremental      | 50% Phased           | 25% Phased           |  |
| 2007             | 1                    | 1                    | 1                    | 1                    | 1                    | 1                    |  |
| 2008             | -0.3% (-0.4%, -0.2%) | -0.2% (-0.2%, -0.1%) | -0.1% (-0.1%, -0.1%) | 0% (0%, 0%)          | -0.2% (-0.2%, -0.1%) | -0.1% (-0.1%, -0.1%) |  |
| 2009             | -0.6% (-0.7%, -0.5%) | -0.4% (-0.5%, -0.3%) | -0.2% (-0.2%, -0.2%) | -0.1% (-0.1%, -0.1%) | -0.3% (-0.3%, -0.2%) | -0.1% (-0.2%, -0.1%) |  |
| 2010             | -0.8% (-0.9%, -0.6%) | -0.6% (-0.7%, -0.5%) | -0.3% (-0.4%, -0.3%) | -0.1% (-0.2%, -0.1%) | -0.4% (-0.4%, -0.3%) | -0.2% (-0.2%, -0.1%) |  |
| 2011             | -0.8% (-0.9%, -0.6%) | -0.6% (-0.8%, -0.5%) | -0.4% (-0.5%, -0.3%) | -0.2% (-0.2%, -0.1%) | -0.4% (-0.4%, -0.3%) | -0.2% (-0.2%, -0.2%) |  |
| 2012             | -0.7% (-0.9%, -0.6%) | -0.6% (-0.8%, -0.5%) | -0.5% (-0.6%, -0.4%) | -0.2% (-0.2%, -0.2%) | -0.4% (-0.4%, -0.3%) | -0.2% (-0.3%, -0.2%) |  |
| 2013             | -0.7% (-0.8%, -0.6%) | -0.6% (-0.7%, -0.5%) | -0.5% (-0.6%, -0.4%) | -0.2% (-0.3%, -0.2%) | -0.4% (-0.4%, -0.3%) | -0.2% (-0.3%, -0.2%) |  |
| 2014             | -0.7% (-0.8%, -0.5%) | -0.6% (-0.7%, -0.5%) | -0.5% (-0.6%, -0.4%) | -0.2% (-0.3%, -0.2%) | -0.4% (-0.5%, -0.3%) | -0.3% (-0.3%, -0.2%) |  |
| 2015             | -0.6% (-0.7%, -0.5%) | -0.5% (-0.7%, -0.4%) | -0.5% (-0.6%, -0.4%) | -0.2% (-0.3%, -0.2%) | -0.4% (-0.5%, -0.3%) | -0.3% (-0.3%, -0.2%) |  |
| 2016             | -0.5% (-0.7%, -0.4%) | -0.5% (-0.6%, -0.4%) | -0.4% (-0.5%, -0.3%) | -0.2% (-0.3%, -0.2%) | -0.4% (-0.5%, -0.3%) | -0.2% (-0.3%, -0.2%) |  |
| Power generation | Zero out             | 50% Incremental      | 25% Incremental      | 10% Incremental      | 50% Phased           | 25% Phased           |  |
| 2007             | 1                    | 1                    | 1                    | 1                    | 1                    | 1                    |  |
| 2008             | -0.2% (-0.2%, -0.1%) | -0.1% (-0.1%, -0.1%) | 0% (-0.1%, 0%)       | 0% (0%, 0%)          | -0.1% (-0.1%, -0.1%) | 0% (-0.1%, 0%)       |  |
| 2009             | -0.3% (-0.4%, -0.3%) | -0.2% (-0.3%, -0.2%) | -0.1% (-0.1%, -0.1%) | 0% (-0.1%, 0%)       | -0.2% (-0.2%, -0.1%) | -0.1% (-0.1%, -0.1%) |  |
| 2010             | -0.4% (-0.5%, -0.3%) | -0.3% (-0.4%, -0.3%) | -0.2% (-0.2%, -0.1%) | -0.1% (-0.1%, -0.1%) | -0.2% (-0.2%, -0.2%) | -0.1% (-0.1%, -0.1%) |  |
| 2011             | -0.4% (-0.5%, -0.3%) | -0.4% (-0.4%, -0.3%) | -0.2% (-0.3%, -0.2%) | -0.1% (-0.1%, -0.1%) | -0.2% (-0.2%, -0.2%) | -0.1% (-0.1%, -0.1%) |  |
| 2012             | -0.4% (-0.5%, -0.3%) | -0.4% (-0.4%, -0.3%) | -0.3% (-0.3%, -0.2%) | -0.1% (-0.1%, -0.1%) | -0.2% (-0.2%, -0.2%) | -0.1% (-0.2%, -0.1%) |  |



|                               |                      |                        |                        |                        |                      |                      |
|-------------------------------|----------------------|------------------------|------------------------|------------------------|----------------------|----------------------|
| 2013                          | -0.4% (-0.5%, -0.3%) | -0.3% (-0.4%, -0.3%)   | -0.3% (-0.3%, -0.2%)   | -0.1% (-0.1%, -0.1%)   | -0.2% (-0.2%, -0.2%) | -0.1% (-0.2%, -0.1%) |
| 2014                          | -0.4% (-0.4%, -0.3%) | -0.3% (-0.4%, -0.3%)   | -0.3% (-0.3%, -0.2%)   | -0.1% (-0.2%, -0.1%)   | -0.2% (-0.3%, -0.2%) | -0.1% (-0.2%, -0.1%) |
| 2015                          | -0.3% (-0.4%, -0.3%) | -0.3% (-0.4%, -0.2%)   | -0.3% (-0.3%, -0.2%)   | -0.1% (-0.2%, -0.1%)   | -0.2% (-0.3%, -0.2%) | -0.1% (-0.2%, -0.1%) |
| 2016                          | -0.3% (-0.4%, -0.2%) | -0.3% (-0.3%, -0.2%)   | -0.2% (-0.3%, -0.2%)   | -0.1% (-0.2%, -0.1%)   | -0.2% (-0.3%, -0.1%) | -0.1% (-0.2%, -0.1%) |
| <b>Residential combustion</b> | <b>Zero out</b>      | <b>50% Incremental</b> | <b>25% Incremental</b> | <b>10% Incremental</b> | <b>50% Phased</b>    | <b>25% Phased</b>    |
| 2007                          | 1                    | 1                      | 1                      | 1                      | 1                    | 1                    |
| 2008                          | -0.3% (-0.4%, -0.2%) | -0.1% (-0.2%, -0.1%)   | -0.1% (-0.1%, -0.1%)   | 0% (0%, 0%)            | -0.1% (-0.2%, -0.1%) | -0.1% (-0.1%, -0.1%) |
| 2009                          | -0.6% (-0.7%, -0.5%) | -0.4% (-0.5%, -0.3%)   | -0.2% (-0.2%, -0.2%)   | -0.1% (-0.1%, -0.1%)   | -0.3% (-0.3%, -0.2%) | -0.1% (-0.2%, -0.1%) |
| 2010                          | -0.8% (-0.9%, -0.6%) | -0.6% (-0.7%, -0.5%)   | -0.3% (-0.4%, -0.3%)   | -0.1% (-0.2%, -0.1%)   | -0.4% (-0.4%, -0.3%) | -0.2% (-0.2%, -0.1%) |
| 2011                          | -0.8% (-0.9%, -0.6%) | -0.6% (-0.8%, -0.5%)   | -0.4% (-0.5%, -0.3%)   | -0.2% (-0.2%, -0.1%)   | -0.4% (-0.4%, -0.3%) | -0.2% (-0.2%, -0.2%) |
| 2012                          | -0.8% (-0.9%, -0.6%) | -0.7% (-0.8%, -0.5%)   | -0.5% (-0.6%, -0.4%)   | -0.2% (-0.2%, -0.2%)   | -0.4% (-0.4%, -0.3%) | -0.2% (-0.3%, -0.2%) |
| 2013                          | -0.7% (-0.9%, -0.6%) | -0.6% (-0.8%, -0.5%)   | -0.5% (-0.6%, -0.4%)   | -0.2% (-0.3%, -0.2%)   | -0.4% (-0.4%, -0.3%) | -0.2% (-0.3%, -0.2%) |
| 2014                          | -0.7% (-0.8%, -0.5%) | -0.6% (-0.7%, -0.5%)   | -0.5% (-0.6%, -0.4%)   | -0.2% (-0.3%, -0.2%)   | -0.4% (-0.5%, -0.3%) | -0.3% (-0.3%, -0.2%) |
| 2015                          | -0.6% (-0.7%, -0.5%) | -0.5% (-0.7%, -0.4%)   | -0.5% (-0.6%, -0.4%)   | -0.2% (-0.3%, -0.2%)   | -0.4% (-0.5%, -0.3%) | -0.3% (-0.3%, -0.2%) |
| 2016                          | -0.6% (-0.7%, -0.4%) | -0.5% (-0.6%, -0.4%)   | -0.4% (-0.5%, -0.3%)   | -0.2% (-0.3%, -0.2%)   | -0.4% (-0.5%, -0.3%) | -0.2% (-0.3%, -0.2%) |
| <b>Transportation</b>         | <b>Zero out</b>      | <b>50% Incremental</b> | <b>25% Incremental</b> | <b>10% Incremental</b> | <b>50% Phased</b>    | <b>25% Phased</b>    |
| 2007                          | 1                    | 1                      | 1                      | 1                      | 1                    | 1                    |
| 2008                          | -0.3% (-0.4%, -0.3%) | -0.2% (-0.2%, -0.1%)   | -0.1% (-0.1%, -0.1%)   | 0% (0%, 0%)            | -0.2% (-0.2%, -0.1%) | -0.1% (-0.1%, -0.1%) |
| 2009                          | -0.6% (-0.7%, -0.5%) | -0.4% (-0.5%, -0.3%)   | -0.2% (-0.2%, -0.2%)   | -0.1% (-0.1%, -0.1%)   | -0.3% (-0.3%, -0.2%) | -0.1% (-0.2%, -0.1%) |
| 2010                          | -0.8% (-0.9%, -0.7%) | -0.6% (-0.7%, -0.5%)   | -0.3% (-0.4%, -0.3%)   | -0.1% (-0.2%, -0.1%)   | -0.4% (-0.5%, -0.3%) | -0.2% (-0.2%, -0.2%) |
| 2011                          | -0.8% (-1.0%, -0.7%) | -0.7% (-0.8%, -0.6%)   | -0.4% (-0.5%, -0.4%)   | -0.2% (-0.2%, -0.1%)   | -0.4% (-0.5%, -0.3%) | -0.2% (-0.3%, -0.2%) |
| 2012                          | -0.8% (-0.9%, -0.6%) | -0.7% (-0.8%, -0.6%)   | -0.5% (-0.6%, -0.4%)   | -0.2% (-0.3%, -0.2%)   | -0.4% (-0.5%, -0.3%) | -0.2% (-0.3%, -0.2%) |
| 2013                          | -0.8% (-0.9%, -0.6%) | -0.7% (-0.8%, -0.5%)   | -0.5% (-0.6%, -0.4%)   | -0.2% (-0.3%, -0.2%)   | -0.4% (-0.5%, -0.3%) | -0.3% (-0.3%, -0.2%) |
| 2014                          | -0.7% (-0.8%, -0.6%) | -0.6% (-0.8%, -0.5%)   | -0.5% (-0.6%, -0.4%)   | -0.2% (-0.3%, -0.2%)   | -0.4% (-0.5%, -0.3%) | -0.3% (-0.3%, -0.2%) |
| 2015                          | -0.6% (-0.8%, -0.5%) | -0.6% (-0.7%, -0.5%)   | -0.5% (-0.6%, -0.4%)   | -0.3% (-0.3%, -0.2%)   | -0.4% (-0.5%, -0.3%) | -0.3% (-0.3%, -0.2%) |
| 2016                          | -0.6% (-0.7%, -0.4%) | -0.5% (-0.6%, -0.4%)   | -0.4% (-0.6%, -0.3%)   | -0.3% (-0.3%, -0.2%)   | -0.4% (-0.5%, -0.3%) | -0.3% (-0.3%, -0.2%) |

## Figure Legends

**Figure S1.** Causal diagram for the association between ambient PM<sub>2.5</sub> and mortality

**Figure S2.** Flow chart of cohort creation

**Figure S3.** Annual mean exposure to ambient PM<sub>2.5</sub> in the 2006 CanCHEC cohort (2.7M adults, aged 30-79 years), by year

**Figure S4.** Changes in mean annual exposure of ambient PM<sub>2.5</sub> in the 2006 CanCHEC cohort (2.7M adults, aged 30-79 years) if source contributions to PM<sub>2.5</sub> exposure had been reduced in Canada over the period 2007-2016, by selected major emission sources and intervention strategies relative to the natural course of observed PM<sub>2.5</sub> exposures ('no intervention' scenario)

**Figure S5.** Sensitivity analyses of PM<sub>2.5</sub> reduction with mortality in the CanCHEC cohort, 2007-2016 (expressed as absolute difference in mortality risks, per million), by emission sources and strategies

**Figure S6.** Sensitivity analyses of PM<sub>2.5</sub> reduction with mortality in the CanCHEC cohort, 2007-2016 (expressed as percentage change in mortality risk, in %), by emission sources and strategies

**Figure S7.** Comparison of observed and predicted survival probability, PM<sub>2.5</sub> exposure, and time-varying covariates for each year during the period 2007-2016

**Figure S8.** Absolute change in mortality risk and 95% confidence interval (95% CI) per million persons for the associations of reductions in source contributions to PM<sub>2.5</sub> with premature mortality in the 2006 CanCHEC cohort over the period 2007-2016, by two selected emission sources, intervention strategies, and personal-level characteristics at baseline

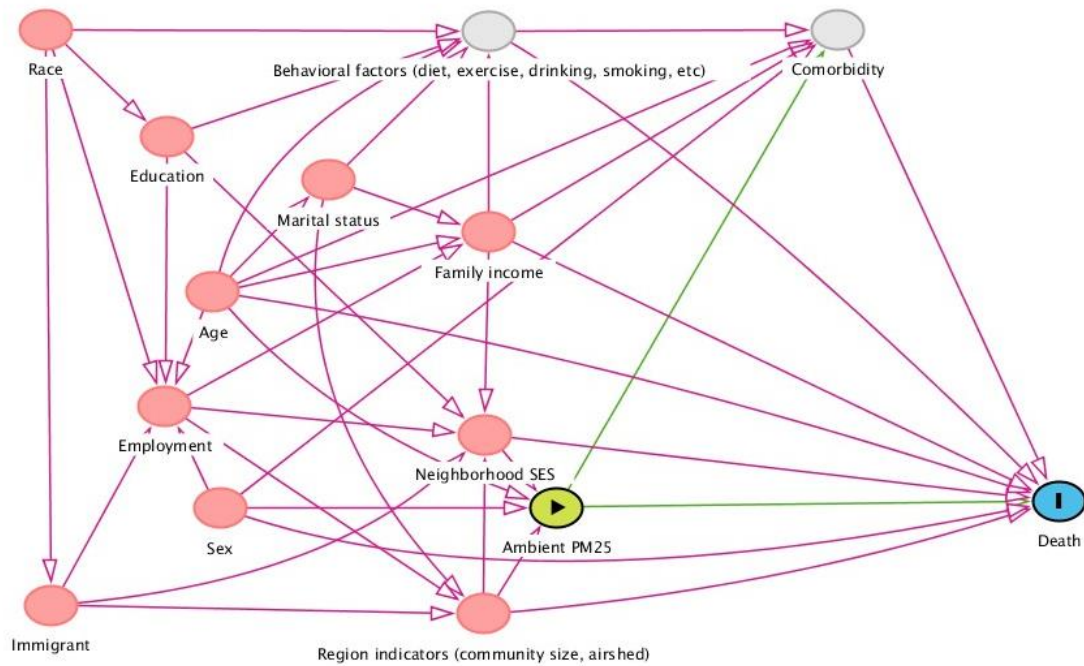

**Figure S1.** Causal diagram for the association between ambient PM<sub>2.5</sub> and mortality (note that grey nodes indicate unmeasured factors whereas red nodes denote measured factors)

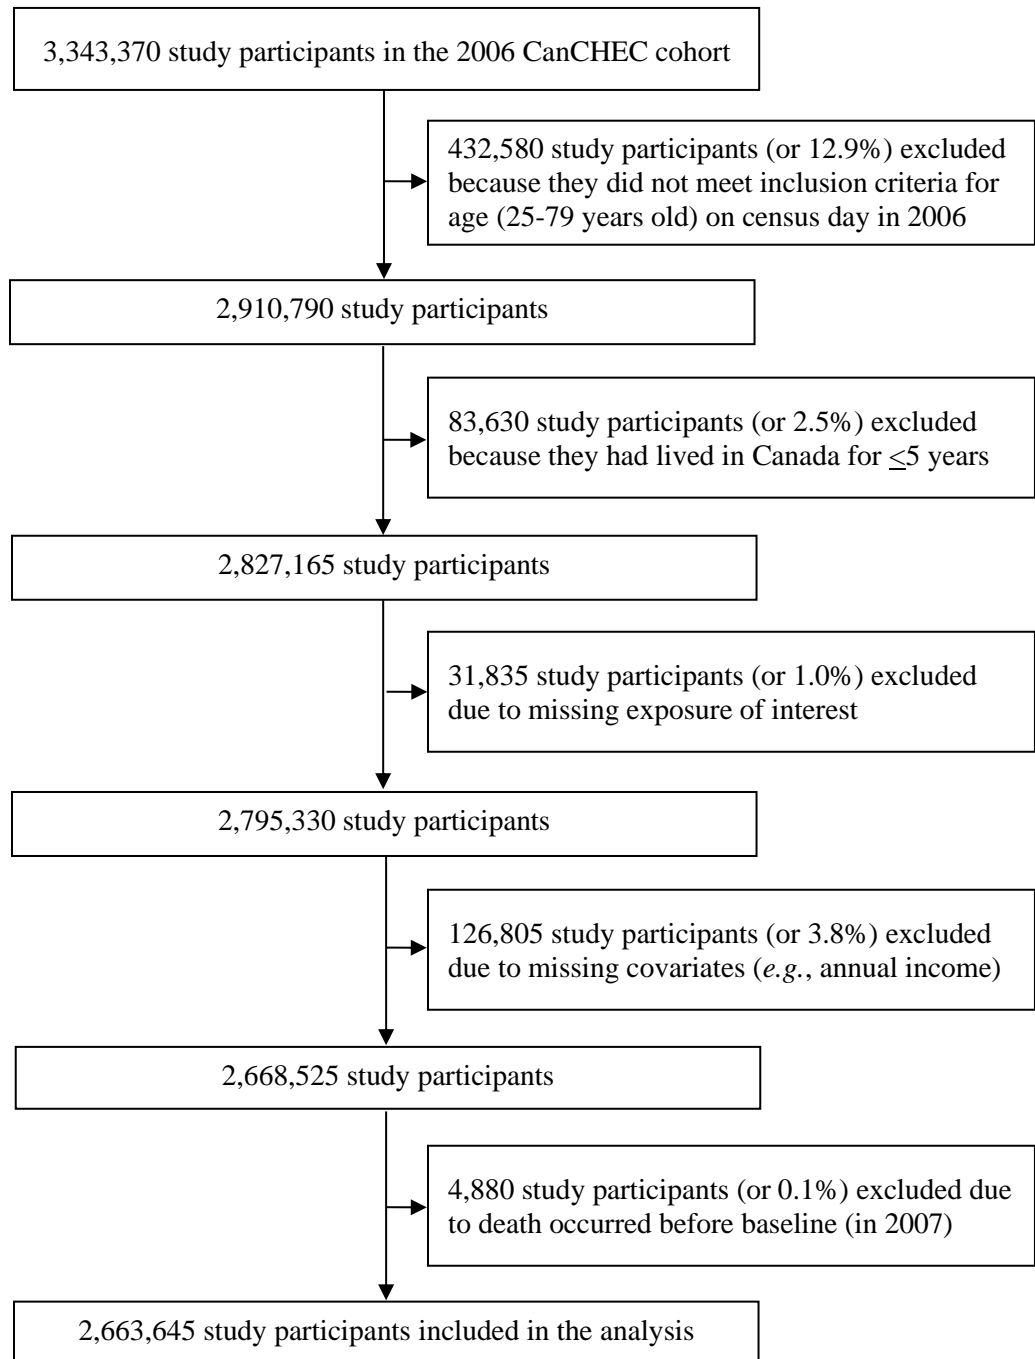

**Figure S2.** Flow chart of cohort creation

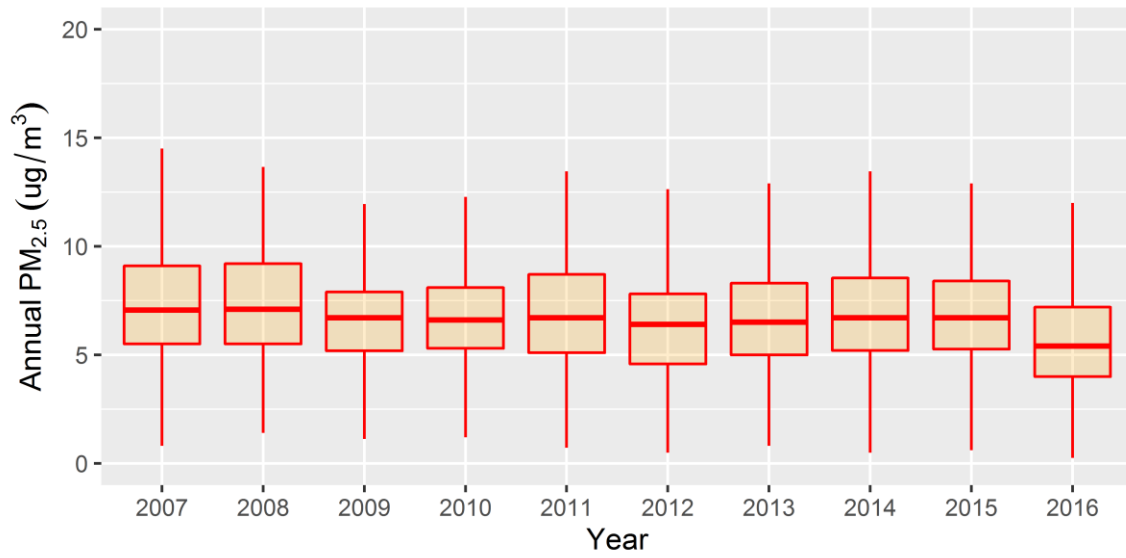

**Figure S3.** Annual mean exposure to ambient PM<sub>2.5</sub> in the 2006 CanCHEC cohort (2.7M adults, aged 30-79 years), by year

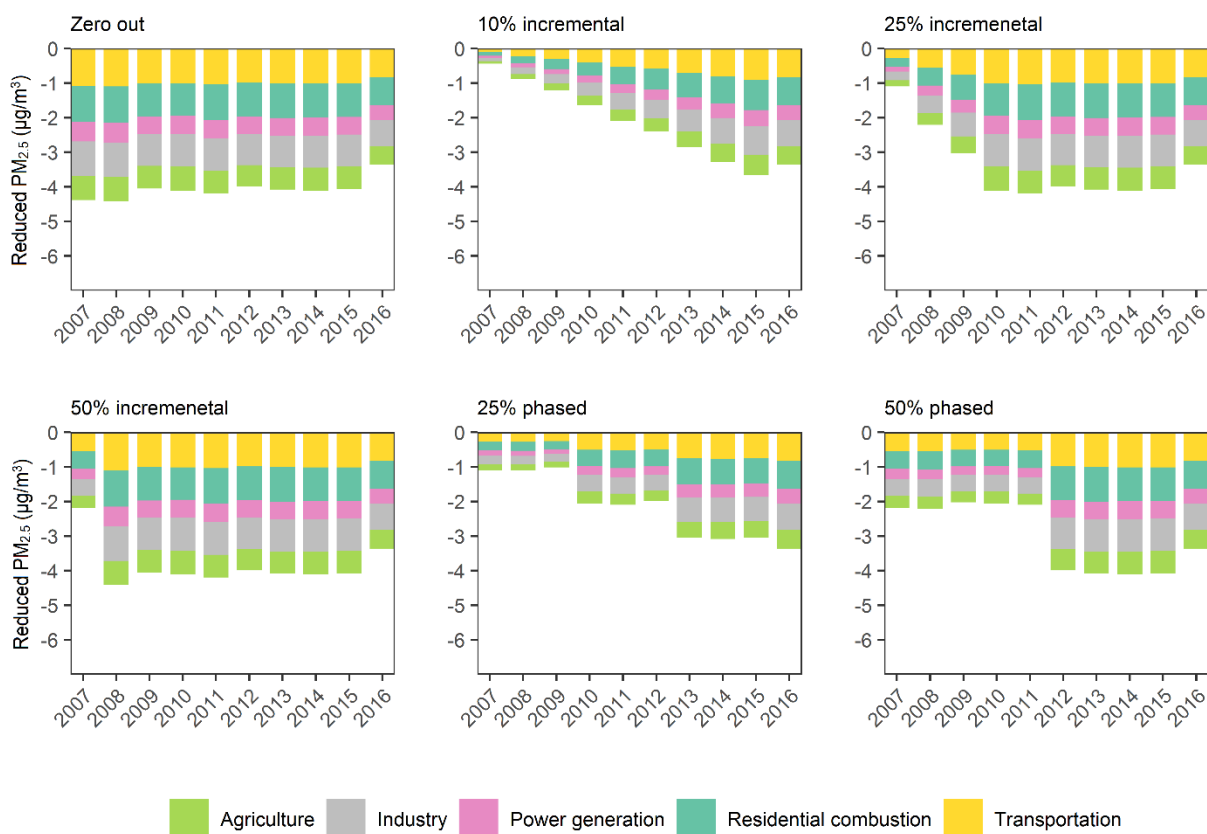

**Figure S4.** Changes in mean annual exposure of ambient PM<sub>2.5</sub> in the 2006 CanCHEC cohort (2.7M adults, aged 30-79 years) if source contributions to PM<sub>2.5</sub> exposure had been reduced in Canada over the period 2007-2016, by selected major emission sources and intervention strategies relative to the natural course of observed PM<sub>2.5</sub> exposures ('no intervention' scenario)

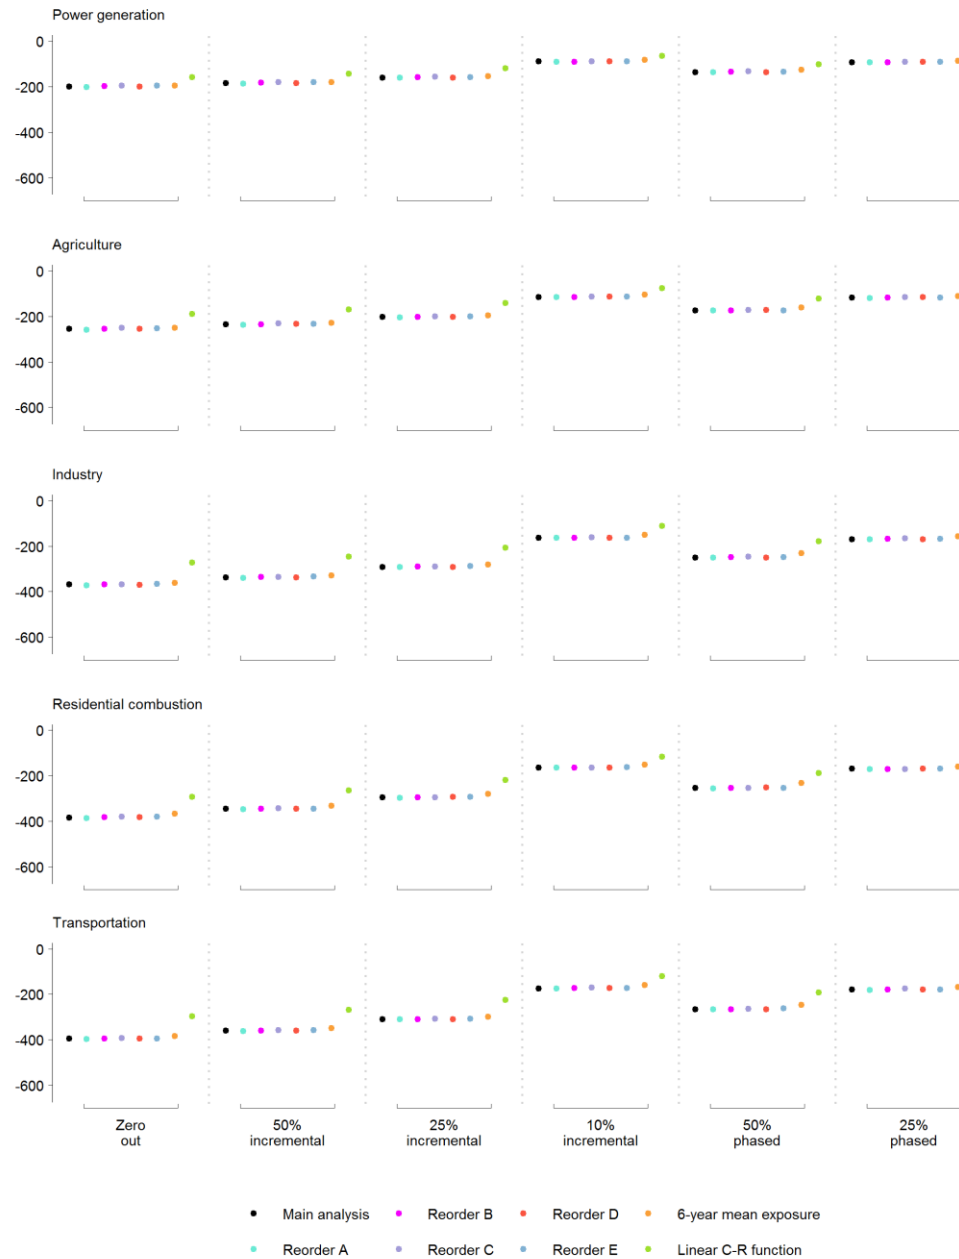

**Figure S5.** Sensitivity analyses of  $PM_{2.5}$  reduction with mortality in the CanCHEC cohort, 2007-2016 (expressed as absolute difference in mortality risks, per million), by emission sources and strategies ([1] Reorder B assumed a causal ordering of time-varying covariates: airshed  $\rightarrow$  community size  $\rightarrow$  urban form  $\rightarrow$  area-level deprivation  $\rightarrow$  income  $\rightarrow$   $PM_{2.5}$ ; [2] Reorder C: income  $\rightarrow$  airshed  $\rightarrow$  community size  $\rightarrow$  urban form  $\rightarrow$  area-level deprivation  $\rightarrow$   $PM_{2.5}$ ; [3] Reorder D: airshed  $\rightarrow$  community size  $\rightarrow$  urban form  $\rightarrow$   $PM_{2.5}$   $\rightarrow$  income  $\rightarrow$  area-level deprivation; [4] Reorder E:  $PM_{2.5}$   $\rightarrow$  airshed  $\rightarrow$  community size  $\rightarrow$  urban form  $\rightarrow$  income  $\rightarrow$  area-level deprivation; [5] 6-year mean exposure denotes 6-year moving average of  $PM_{2.5}$  with 1-yr lag; [6] linear C-R function assumes a log-linear shape of  $PM_{2.5}$ -mortality association)

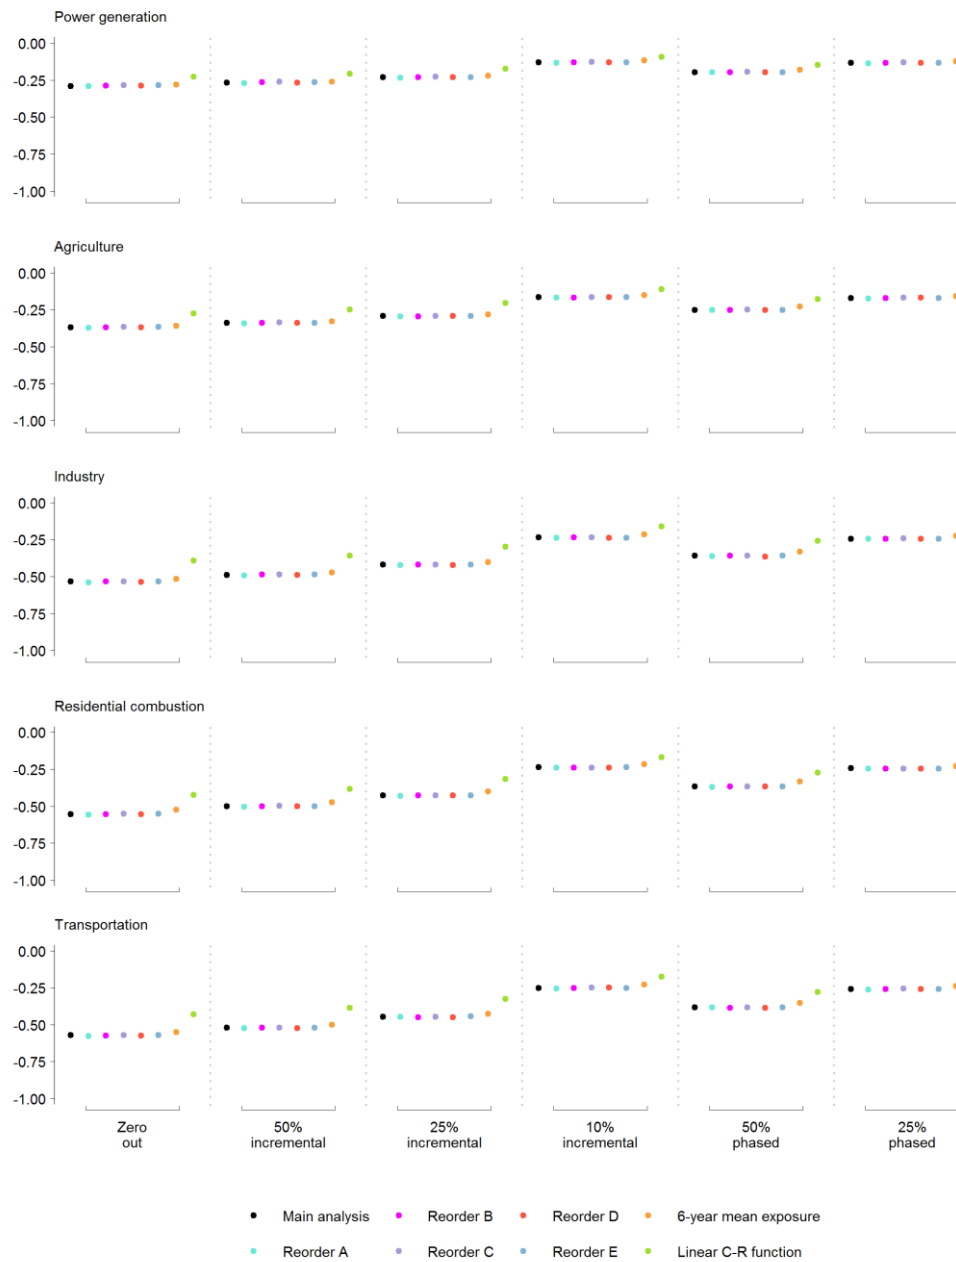

**Figure S6.** Sensitivity analyses of  $PM_{2.5}$  reduction with mortality in the CanCHEC cohort, 2007-2016 (expressed as percentage change in mortality risk, in %), by emission sources and strategies ([1] Reorder B assumed a causal ordering of time-varying covariates: airshed  $\rightarrow$  community size  $\rightarrow$  urban form  $\rightarrow$  area-level deprivation  $\rightarrow$  income  $\rightarrow$   $PM_{2.5}$ ; [2] Reorder C: income  $\rightarrow$  airshed  $\rightarrow$  community size  $\rightarrow$  urban form  $\rightarrow$  area-level deprivation  $\rightarrow$   $PM_{2.5}$ ; [3] Reorder D: airshed  $\rightarrow$  community size  $\rightarrow$  urban form  $\rightarrow$   $PM_{2.5}$   $\rightarrow$  income  $\rightarrow$  area-level deprivation; [4] Reorder E:  $PM_{2.5}$   $\rightarrow$  airshed  $\rightarrow$  community size  $\rightarrow$  urban form  $\rightarrow$  income  $\rightarrow$  area-level deprivation; [5] 6-year mean exposure denotes 6-year moving average of  $PM_{2.5}$  with 1-year lag; [6] linear C-R function assumes a log-linear shape of  $PM_{2.5}$ -mortality association)



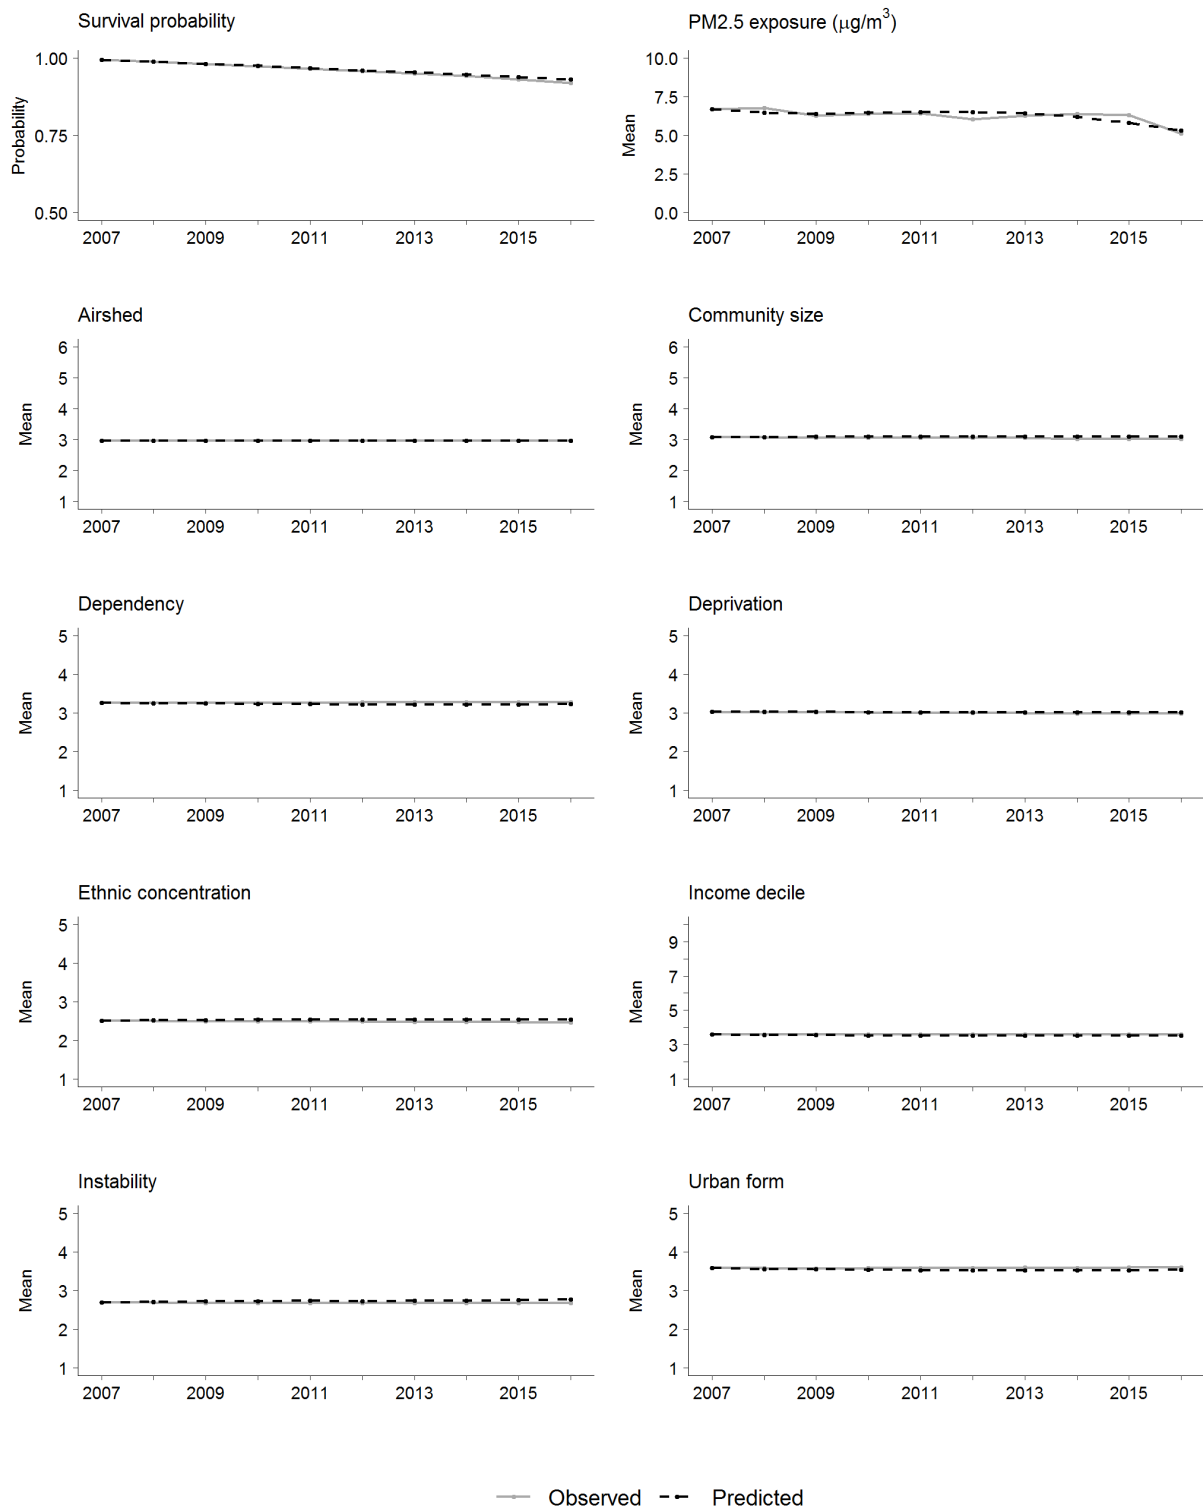

**Figure S7.** Comparison of observed and predicted survival probability, PM<sub>2.5</sub> exposure, and time-varying covariates for each year during the period 2007-2016

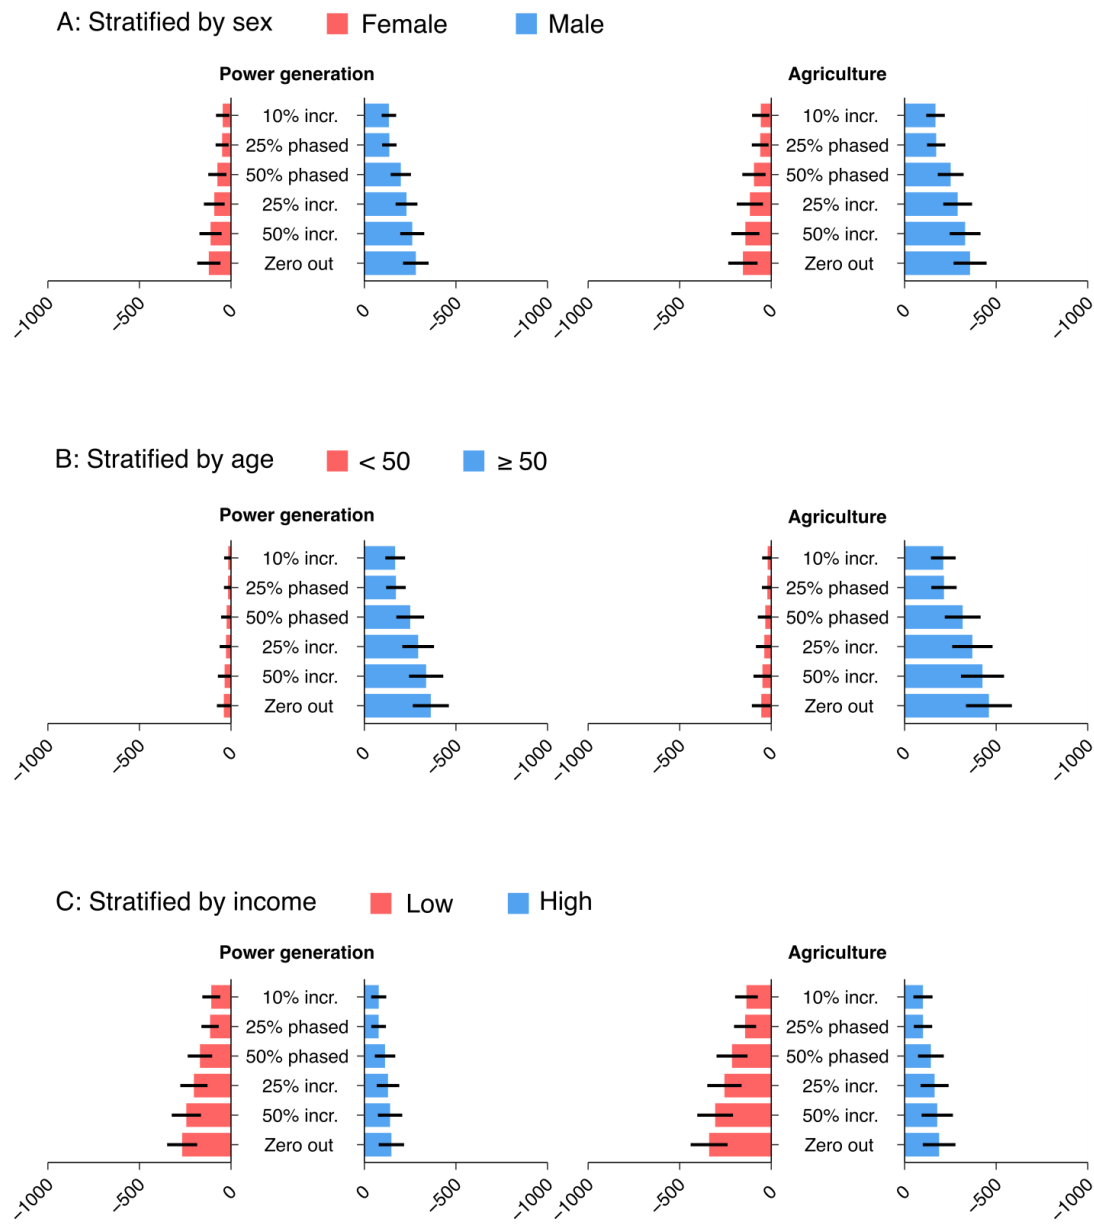

**Figure S8.** Absolute change in mortality risk and 95% confidence interval (95% CI) per million persons for the associations of reductions in source contributions to PM<sub>2.5</sub> with premature mortality in the 2006 CanCHEC cohort over the period 2007-2016, by two selected emission sources, intervention strategies, and personal-level characteristics at baseline

## Reference

1. Greenland S, Robins JM. Identifiability, exchangeability, and epidemiological confounding. *Int J Epidemiol* 1986; **15**(3): 413-9.
2. Hernán MA. The C-Word: Scientific Euphemisms Do Not Improve Causal Inference From Observational Data. *Am J Public Health* 2018; **108**(5): 616-9.
3. Hernán MA. A definition of causal effect for epidemiological research. *J Epidemiol Community Health* 2004; **58**(4): 265-71.
4. Pearl J. Causal diagrams for empirical research. *Biometrika* 1995; **82**(4): 669-88.
